# Supplementary material for: Diagnostic markers of acute infections in infants aged 1 week to 3 months: a retrospective cohort study
Source: PubMed Central journal article supplement — BMJ Open. 2018 Jan 24;8(1):e018092. doi: 10.1136/bmjopen-2017-018092 (PMC5786092; doi:10.1136/bmjopen-2017-018092), 2018-01-24
Supplement: bmjopen-2017-018092.draft_revisions.pdf [file bmjopen-2017-018092.draft_revisions.pdf]

# BMJ Open

BMJ Open is committed to open peer review. As part of this commitment we make the peer review history of every article we publish publicly available.

When an article is published we post the peer reviewers' comments and the authors' responses online. We also post the versions of the paper that were used during peer review. These are the versions that the peer review comments apply to.

The versions of the paper that follow are the versions that were submitted during the peer review process. They are not the versions of record or the final published versions. They should not be cited or distributed as the published version of this manuscript.

BMJ Open is an open access journal and the full, final, typeset and author-corrected version of record of the manuscript is available on our site with no access controls, subscription charges or pay-per-view fees (<http://bmjopen.bmj.com>).

If you have any questions on BMJ Open's open peer review process please email [editorial.bmjopen@bmj.com](mailto:editorial.bmjopen@bmj.com)

# BMJ Open

## Diagnostic markers of acute infections in infants aged 1 week to 3 months - a retrospective cohort study

|                                 |                                                                                                                                                                                                                                                                                                                                                                                                                                                                                                                                                                                                                                    |
|---------------------------------|------------------------------------------------------------------------------------------------------------------------------------------------------------------------------------------------------------------------------------------------------------------------------------------------------------------------------------------------------------------------------------------------------------------------------------------------------------------------------------------------------------------------------------------------------------------------------------------------------------------------------------|
| Journal:                        | <i>BMJ Open</i>                                                                                                                                                                                                                                                                                                                                                                                                                                                                                                                                                                                                                    |
| Manuscript ID                   | bmjopen-2017-018092                                                                                                                                                                                                                                                                                                                                                                                                                                                                                                                                                                                                                |
| Article Type:                   | Research                                                                                                                                                                                                                                                                                                                                                                                                                                                                                                                                                                                                                           |
| Date Submitted by the Author:   | 05-Jun-2017                                                                                                                                                                                                                                                                                                                                                                                                                                                                                                                                                                                                                        |
| Complete List of Authors:       | Hamiel, Uri; Assaf Harofeh Medical Center, Pediatrics; Tel Aviv University Sackler Faculty of Medicine,<br>Bahat, Hilla; Assaf Harofeh Medical Center, Pediatrics; Tel Aviv University Sackler Faculty of Medicine<br>Kozler, Eran; Assaf Harofeh Medical Center, Emergency Department ; Tel Aviv University Sackler Faculty of Medicine<br>Hamiel, Yotam; Tel Aviv University Blavatnik School of Computer Science<br>Ziv-Baran, Tomer; Tel Aviv University, School of Public Health, Sackler Faculty of Medicine<br>Goldman, Michael; Assaf Harofeh Medical Center, Pediatrics; Tel Aviv University, Sackler Faculty of Medicine |
| <b>Primary Subject Heading</b>: | Paediatrics                                                                                                                                                                                                                                                                                                                                                                                                                                                                                                                                                                                                                        |
| Secondary Subject Heading:      | Infectious diseases                                                                                                                                                                                                                                                                                                                                                                                                                                                                                                                                                                                                                |
| Keywords:                       | INFECTIOUS DISEASES, Paediatric infectious disease & immunisation < PAEDIATRICS, ACCIDENT & EMERGENCY MEDICINE                                                                                                                                                                                                                                                                                                                                                                                                                                                                                                                     |
|                                 |                                                                                                                                                                                                                                                                                                                                                                                                                                                                                                                                                                                                                                    |

SCHOLARONE™  
Manuscripts

only

1  
2  
3 **Diagnostic markers of acute infections in infants aged 1 week to 3 months -**  
4  
5 **a retrospective cohort study**  
6  
7

8 **Uri Hamiel<sup>a,b</sup>, Hilla Bahat<sup>a,b</sup>, Eran Kozer<sup>a,b</sup>, Yotam Hamiel<sup>c</sup>,**  
9  
10 **Tomer Ziv-Baran<sup>d</sup>, Michael Goldman<sup>a,b</sup>**  
11  
12

13  
14  
15  
16  
17 <sup>a</sup>Department of Pediatrics, Assaf Harofeh Medical Centre, Zerifin, Israel.

18  
19 <sup>b</sup>Sackler School of Medicine, Tel Aviv University, Tel Aviv, Israel.

20  
21 <sup>c</sup>Blavatnik School of Computer Science, Tel Aviv University, Tel Aviv, Israel,  
22  
23

24  
25 <sup>d</sup>School of Public Health, Sackler Faculty of Medicine, Tel-Aviv University , Tel-Aviv,  
26  
27 Israel.  
28

29  
30 Correspondence to:

31  
32 Uri Hamiel

33  
34 Department of Pediatrics, Assaf Harofeh Medical Centre, Zerifin, 70300, Israel

35  
36 [urihamiel@gmail.com](mailto:urihamiel@gmail.com), Tel: 972-89779133 Fax: 972-89779136  
37  
38

39  
40  
41 UH and HB contributed equally  
42  
43

44  
45  
46 Abbreviations: SBI: serious bacterial infection, IBI: Invasive bacterial infection, NLR: neutrophil to lymphocyte  
47  
48 count ratio, ANC: absolute neutrophil count, CRP: C-reactive protein, AUC: area under the ROC curve, WBC:  
49  
50 White blood count, ED: emergency department, CSF: cerebrospinal fluid, UTI: Urinary tract infections  
51  
52

53  
54 **Word Count: 3053**  
55  
56  
57  
58  
59  
60

## ABSTRACT

**Objective:** History and physical examination do not reliably exclude serious bacterial infections (SBIs) in infants. We examined potential markers of SBI in young febrile infants.

**Design:** We reviewed white blood cell (WBC) count, absolute neutrophil count (ANC), neutrophil to lymphocyte count ratio (NLR), and C-Reactive Protein (CRP) in infants aged one week to 90 days, admitted for fever to one medical center during 2012-2014.

**Results:** SBI was detected in 111 (10.6%) of 1039 infants. Median values of all investigated diagnostic markers were significantly higher in infants with than without SBI: WBC (14.4 vs. 11.4 K/ $\mu$ L,  $p < 0.001$ ), ANC (5.8 vs 3.7 K/ $\mu$ L,  $p < 0.001$ ), CRP (19 vs 5 mg/L  $p < 0.001$ ) and NLR (1.2 vs 0.7,  $p < 0.001$ ).

Areas under the ROC curve (AUC) for predicting SBI were: 0.65 (95% CI 0.59-0.71), 0.69 (95% CI 0.63-0.74), 0.71 (95% CI 0.65-0.76), and 0.66 (95% CI 0.60-0.71) for WBC, ANC, CRP and NLR, respectively. Logistic regression showed the best discriminative ability for the combination of CRP and ANC, with AUC: 0.73 (95% CI 0.67-0.78). For invasive bacterial infection, AUCs were 0.70 (95% CI 0.56-0.85), 0.80 (95% CI 0.67-0.92), 0.78 (95% CI 0.68-0.89) and 0.78 (95% CI 0.66-0.90), respectively. CRP combined with NLR or ANC were the best discriminators of infection, AUCs: 0.82 (95% CI 0.70-0.95) and 0.82 (95% CI 0.68-0.95), respectively.

**Conclusions:** Among young febrile infants, CRP was the best single discriminatory marker of SBI, and ANC was the best for invasive bacterial infection. ANC and NLR can contribute to evaluating this population.

### Strengths and limitations of this study

- This large cohort is one of only a few descriptions of bacterial epidemiology of serious bacterial infection evaluation in young febrile infants seen in the emergency department in the last 10 years.
- We determined cutoff values for a number of infection markers for the evaluation of serious bacterial infection in the 1-week to 3-months age group.
- This is the first study to examine the neutrophil to lymphocyte ratio as a diagnostic marker for bacterial infections in young infants.
- Absolute neutrophil count and the neutrophil to lymphocyte ratio are inexpensive, readily available markers that can be used in settings in which C-reactive protein is not available.
- This is a retrospective study. Not all the older infants in the study underwent a complete workup. Some fairly rare neonatal bacterial infections, such as bacterial pneumonia, gastroenteritis and arthritis were not ruled out. Only a relatively low number of invasive bacterial infections occurred in the study group.

**INTRODUCTION:**

Fever (body temperature > 38.0°C) is a common complaint in infants aged up to 3 months.[1,2] Several protocols have been developed to help clinicians differentiate infants with low risk for serious bacterial infection (SBI), who can be managed as outpatients, from those requiring treatment and hospitalization.[3–5] These protocols use primarily laboratory values such as: leukocytosis (WBC>15,000/ $\mu$ L) or leukopenia (WBC<5000/ $\mu$ L), the presence of leukocyturia or urinary nitrites, and cerebrospinal fluid (CSF) WBC-count to create a stratification of low-risk and high-risk febrile infants. The use of C-reactive protein (CRP) as a marker for SBI is in common clinical use.[6,7] Nonetheless, the prediction value of these laboratory tests remains controversial.

Neutrophil to lymphocyte ratio (NLR) is a measure of systemic inflammation.[8] In adults, NLR was found to predict bacteremia in the emergency department (ED),[9] indicate short and long-term mortalities among critically ill patients and guide prognosis in various acute infections, ischemic heart disease, metabolic diseases, cancer and other medical conditions.[10,11] In children, NLR was found to differentiate between viral and bacterial pneumonia,[12] to be a useful diagnostic marker of acute appendicitis [13] and to predict an attack of familial Mediterranean fever in children already diagnosed with this condition.[14]

The aim of this study was to assess, in hospitalized febrile infants aged 1 week to 3 months, the discriminatory ability of various, commonly available, markers of SBI, including NLR, which has not been previously studied in this age group; and to determine cutoff values that could aid clinicians in the evaluation of febrile infants.

## METHODS

### Study population

This retrospective cohort study comprised previously healthy, full-term infants ( $\geq 37$  weeks at birth), 1 week to 90 days of age, who were admitted to the ED or pediatric department of Assaf Harofeh, a tertiary medical center in Israel, during 2012-2014. Febrile infants (body temperature  $> 38^{\circ}\text{C}$ ) from whom at least a blood count, CRP test and blood culture were taken were included in the analysis. Blood was drawn from all febrile infants who were admitted to the ED. Urine and CSF cultures were taken from all neonates ( $\leq 28$  days old). Urine cultures were taken from infants aged  $> 28$  days who were to receive antibiotics. CSF cultures were taken upon clinical consideration. SBI was defined as the growth of a known pathogen in culture. Invasive bacterial infection (IBI) was determined as the presence of bacteremia or meningitis. Infants with underlying hematologic, immunologic, respiratory or other medical conditions that might involve corticosteroid or antibiotic use in the previous 72 hours were excluded from the analysis. For analysis, we divided the cohort into two age groups: neonatal ( $\leq 28$  days old) and older infants (29 to 90 days old).

### Laboratory data

The following data were collected from the medical records: complete history and physical examination, laboratory evaluation including blood counts, CRP testing, blood cultures, urine cultures and lumbar puncture. Samples were drawn by venepuncture. Blood tests were taken upon admission; when the first sample was technically unsatisfactory and tests were repeated, results of blood counts or CRP were considered only if taken within 24 hours of taking cultures. Blood cell count was

1  
2  
3 performed using the Beckman coulter LH750 design (United States). If a blood  
4 smear was performed, bands were added to the total number of neutrophils. CRP  
5 serum level was measured by immunoturbidimetric assay using the Roche Cobas  
6 c701 (Japan). Blood was drawn for cultures as recommended in a BACTEC-PED.  
7  
8 Blood culture results were examined and identified using the microbiology database.  
9  
10 Urine cultures were obtained by transurethral bladder catheterization or suprapubic  
11  
12 aspiration.  
13  
14  
15  
16  
17  
18  
19

20  
21 From the blood count, ANC was retrieved and NLR was calculated as the ratio of  
22 neutrophils to lymphocytes. An age-adjusted NLR ratio was also created, by dividing  
23 NLR by a mean NLR based on the medical literature,[15] according to age groups  
24 (1-2 weeks, 2 weeks to 1 month, 1 month and older). UTI was defined as the  
25 isolation of >50,000 colony forming units per milliliter of urine of a single pathogen,  
26 not deemed as a contamination by a pediatric infectious specialist. Urinary analysis  
27 was not considered in this study. Cultures with more than one isolate were  
28 considered to be contaminated. Blood cultures were considered contaminated by  
29 pathogens and by the clinical course of the patient, following review of a pediatric  
30 infectious specialist. Patients were either discharged home from the ED or  
31 hospitalized at the pediatric department. The study was approved by the local  
32 institutional ethics review board.  
33  
34  
35  
36  
37  
38  
39  
40  
41  
42  
43  
44  
45  
46  
47  
48

### 49 **Statistical Analysis**

50 Statistical analyses were performed using SPSS (IBM Corp. Released 2015. IBM  
51 SPSS Statistics for Windows, Version 23.0. Armonk, NY: IBM Corp.). All tests were  
52 two-sided, and values of  $P < 0.05$  were considered statistically significant. Descriptive  
53  
54  
55  
56  
57  
58  
59  
60



1  
2  
3 statistics are presented as numbers and percentages for categorical variables, and  
4  
5 as means and standard deviations (SD), or medians and interquartile ranges (IQR).  
6  
7 Continuous variables were evaluated for normal distribution using histogram.  
8  
9 Categorical variables were compared by  $\chi^2$  test or Fisher exact, and continuous  
10  
11 variables were compared by t test or Mann-Whitney test, as appropriate. Univariate  
12  
13 logistic regression was used to evaluate the association of age, sex and blood tests  
14  
15 with SBI. Logistic regression was used to evaluate the probability of having SBI. The  
16  
17 multivariate logistic regression included the infection markers studied, and the  
18  
19 probability calculated was the basis for the ROC curve analysis. The discriminative  
20  
21 ability of each studied predictor was observed using the area under the receiver  
22  
23 operating characteristic curve (AUC). Chi-squared Automatic Interaction Detection  
24  
25 (CHAID) [16] and Classification and Regression Trees (CART) [17] were used to  
26  
27 identify threshold values of blood tests for SBI. Sensitivity, specificity, positive  
28  
29 likelihood ratio, negative likelihood ratio, positive predicted values and negative  
30  
31 predicted values were reported.  
32  
33  
34  
35  
36  
37  
38

## 39 RESULTS

40 During the study period, 1790 febrile infants aged 7 to 90 days were admitted to the  
41  
42 ED or pediatric department. Of them, 68 preterm infants, 87 with underlying disease  
43  
44 and 336 with incomplete medical records were excluded from the analysis.  
45  
46

47 Incomplete medical records were mainly due to the absence of one of the following:  
48  
49 a blood count within 24 hours of blood cultures, a CRP value, a blood culture, or any  
50  
51 bacterial culture in the neonatal age group. Of 1299 patients who met the inclusion  
52  
53 criteria, 260 were excluded since their cultures were considered contaminated, as  
54  
55 detailed below (Figure 1). There were no statistically significant differences in the  
56  
57  
58  
59  
60

1  
2  
3 mean values of any of the markers studied, between those with contaminated  
4 cultures and those without an SBI ( $p>0.05$ ). Females and younger infants were more  
5 likely to have contaminated cultures ( $p<0.01$ ). Since no statistically significant  
6 differences were found between the contaminated and the non-SBI groups, we  
7 decided to exclude the contaminated cultures so as to avoid misclassification bias.  
8  
9

10  
11  
12 The final study cohort comprised 1039 infants; of them, 208 (20%) were neonates  
13 (ages 7-28 days old). In addition to blood cultures, urine culture results were  
14 available for 827 infants, and CSF cultures for 587.  
15

16  
17  
18 SBI was detected in 111 (10.6%) infants. Infants with SBI tended to be younger,  
19 median 34 (IQR 18-56) vs 46 (IQR 32-60) days,  $p<0.001$ . Boys comprised 60.4% of  
20 the febrile infants but only 54% of the infants with SBI. UTI was detected in 104  
21 (10%) infants, bacteremia in 11 (1.1%) and meningitis in 2 (0.2%). Four of the  
22 patients with UTI had concurrent bacteremia and two had concurrent meningitis. UTI  
23 was the most common SBI (94%). *Escherichia coli* was the most common pathogen,  
24 detected in 74 (71.1%) of the UTIs; followed by *klebsiella pneumoniae* in 13 (12.5%),  
25 and *enterococcus faecalis* in 8 (7.6%).  
26  
27  
28  
29  
30  
31  
32  
33  
34  
35  
36  
37  
38  
39  
40  
41  
42  
43  
44

45  
46 Median values of all the diagnostic markers investigated were significantly higher in  
47 patients with than without SBI: WBC count (14.4 vs. 11.4 K/ $\mu$ L  $p<0.001$ ), ANC (5.8  
48 vs 3.7K/ $\mu$ L  $p<0.001$ ), CRP (19 vs 5 mg/L  $p<0.001$ ) and NLR (1.2 vs 0.7)  $p<0.001$   
49 (Table 1). There was no statistically significant difference in the assessment of SBI  
50 between the unadjusted NLR ratio and the adjusted for age NLR ratio.  
51  
52  
53  
54

55  
56 The sensitivity, specificity and ratio values of WBC, CRP and NLR for the prediction  
57 of SBI are shown in Tables 2 and 3. AUCs for the prediction of SBI were 0.65 (95%  
58  
59  
60

1  
2  
3 CI: 0.6-0.71), 0.69 (95% CI 0.63-0.74), 0.71 (95% CI 0.65-0.76) and 0.66 (95% CI  
4 0.6-0.71) for WBC, ANC, CRP and NLR, respectively. CRP combined with ANC or  
5 NLR showed the best discriminatory values for a SBI: AUC of 0.73 (95% CI 0.67-  
6 0.78) and 0.72 (95% CI 0.66-0.78), respectively (Table 4 and Figure 2).  
7  
8  
9  
10

11  
12  
13  
14 In an analysis of infants with an IBI such as bacteremia or meningitis, the ANC, CRP  
15 and NLR performed similarly as discriminatory factors, with AUC of 0.80 (95% CI  
16 0.67-0.92), 0.78 (95% CI 0.68-0.89) and 0.78 (95% CI 0.66-0.90), respectively,  
17 compared to AUC 0.70 (95% CI 0.56-0.85) for WBC. The combinations of CRP with  
18 NLR and with ANC were the best predictors of bacterial infection: AUCs of 0.82  
19 (95% CI 0.70-0.95) and 0.82 (95% CI 0.68-0.95), respectively. (Figure 3)  
20  
21  
22  
23  
24  
25  
26  
27  
28

29  
30 All neonatal infants (aged <28 days) had undergone a full sepsis workup (CSF, blood  
31 and urine cultures were obtained); 44 infants (21.1%) had at least one positive  
32 culture. All mean investigated diagnostic markers were significantly higher in patients  
33 with than without SBI (Table 1). The sensitivity and specificity of NLR, CRP and  
34 WBC for predicting SBI tended to be greater for the younger than the older age  
35 group (Tables 2 and 3).  
36  
37  
38  
39  
40  
41  
42  
43  
44

45 CRP combined with either ANC or NRL increased the prediction of a SBI, compared  
46 to CRP alone (AUC 0.78 to AUC 0.79) in the neonatal age group. The combination  
47 of optimal cutoff values for CRP and NLR in identifying a SBI is depicted in a  
48 decision tree (Figure 4). For the neonatal age group, the overall SBI rate was 21.2%.  
49 For infants with CRP>46.1 mg/L (11% of the neonates), the risk for a SBI was 87%,  
50 compared to 13% for those with CRP<46.1 mg/L. Using a cutoff point of NLR<2.4 we  
51  
52  
53  
54  
55  
56  
57  
58  
59  
60

1  
2  
3 found that infants with CRP<46.1 mg/L and NLR<2.4 have a risk of 9.7% for a SBI,  
4  
5 compared with a 29% risk for those with NLR>2.4. The risk is further reduced to  
6  
7 5.4% for infants with NLR<0.77.  
8  
9

## 10 11 **DISCUSSION**

12  
13 Our data reveal that NLR, ANC and CRP performed better in predicting SBI in the  
14  
15 neonatal age group than among older infants. CRP was found to be the single best  
16  
17 indicator for predicting a non-invasive SBI in both the neonates and older infants. In  
18  
19 the absence of CRP, the markers ANC and NLR have similar sensitivity for  
20  
21 identifying serious bacterial disease, especially in neonates. Both were similar as  
22  
23 indicators for predicting an IBI in infants younger than 3 months of age. The  
24  
25 composite of ANC with CRP, or NLR with CRP, outperforms any of the single  
26  
27 studied markers for SBI or IBI.  
28  
29  
30  
31  
32  
33

34 In the United States, the incidence rate of all SBIs in infants younger than 90 days  
35  
36 was estimated at 3.75/1000 full-term infants.[18] Bacterial infection still represents an  
37  
38 important cause of morbidity and mortality among young infants.[19] Our results  
39  
40 concur with other large studies that reported SBI to be ultimately diagnosed in about  
41  
42 10% of febrile infants in this age group. [20] Differentiating between bacterial and  
43  
44 viral infections in young infants is of utmost importance. Failure to identify bacterial  
45  
46 pathogens may lead to delayed initiation of therapy and severe illness on one hand;  
47  
48 or to prolonged and unnecessary therapy and the emergence of resistant  
49  
50 microorganisms on the other hand. Several clinical and laboratory parameters are  
51  
52 generally considered together to diagnose SBIs in this age group, although the  
53  
54 optimal combination has not been determined.[5]  
55  
56  
57  
58  
59  
60

1  
2  
3  
4  
5 The early hyperdynamic phase of infection is characterized by a proinflammatory  
6 state and mediated by neutrophils, macrophages and monocytes, with the release of  
7 inflammatory cytokines. The onset of acute neutrophilia is associated with the  
8 generation of endotoxin, TNF, IL-1, IL-8 and hematopoietic growth factors such as  
9 G-CSF. Maximal response usually occurs within 4 to 24 hours of exposure to these  
10 agents and probably results from the release of neutrophils from the marrow into  
11 circulation.[21] The systemic inflammatory response is also associated with  
12 suppression of neutrophil apoptosis and increase in lymphocyte apoptosis.[22]  
13  
14  
15  
16  
17  
18  
19  
20  
21  
22  
23  
24

25 To the best of our knowledge this is the first study to assess NLR as a diagnostic  
26 marker of bacterial infection in febrile young infants. In this large cohort of young  
27 febrile infants, we found that those with a SBI had statistically significant higher  
28 mean values of WBC, ANC, NLR and CRP. Of these markers, CRP was the best  
29 discriminatory parameter for a SBI. These findings concur with the results of another  
30 prospective Israeli study that found CRP to be a valuable laboratory test in the  
31 assessment of febrile infants aged <3 months old.[6] However, in other studies,  
32 plasma CRP level was found to inadequately predict serious bacterial infection in  
33 neonates. In a study conducted in Taiwan, CRP level was not elevated at the onset  
34 of clinical sepsis in approximately one-fourth of the cases of SBI in neonates.[23]  
35  
36 The low sensitivity of CRP may be due to its delayed elevation; an estimated 6-12  
37 hours is needed for a significant increase.[24] This is especially relevant in young  
38 febrile infants who usually arrive to the ED soon after the onset of fever. Thus, the  
39 identification of other predictors for neonatal sepsis is important. There is no one  
40 acceptable cutoff value of CRP for assessing an SBI in the febrile infant; however,  
41  
42  
43  
44  
45  
46  
47  
48  
49  
50  
51  
52  
53  
54  
55  
56  
57  
58  
59  
60

1  
2  
3 studies use the cutoff values of 40 and 20 mg/L to rule in and rule out an SBI  
4  
5 respectively.[25]  
6  
7

8  
9  
10 WBC parameters are known to vary with age. NLR was shown to be positively  
11 associated with age in a healthy population,[26] with the lowest NLR found in the  
12 youngest age group (age<20 years, mean 16 years). The mean value in this age  
13 group was  $1.53 \pm 0.56$ . We did not find any report of normal ranges of NLR values for  
14 healthy neonatal or pediatric populations, though mean values for neutrophils vs  
15 lymphocytes as components of the WBC are 41% vs. 45% at 1 week of age, 40% vs.  
16 48% at 2 weeks, 35% vs. 56% at 1 month and 32% vs. 61% at 6 months.[15] This  
17 suggests a mean NLR value of between 0.52-0.91 for healthy children in the studied  
18 age group. Due to the significant changes in neutrophil and lymphocyte counts from  
19 birth to young adulthood, cutoff values used to distinguish infections in adults differ  
20 from those that we identified for young infants. An NLR cutoff value of >5, when  
21 sufficient exclusion criteria are used, was suggested for detecting bacteremia or  
22 sepsis in adults.[27]  
23  
24  
25  
26  
27  
28  
29  
30  
31  
32  
33  
34  
35  
36  
37  
38  
39

40 Among our neonates, a NLR of 2 did not show statistically different sensitivity from a  
41 CRP value of 40 mg/L (52.3% vs 45.5%  $p < 0.001$ ), though it had lower specificity  
42 (78% vs 97%  $p = 0.67$ ) in distinguishing a SBI in the neonatal age group. Likewise,  
43 compared to the CRP value of 40 mg/L, an ANC of  $7 \times 10^3 / \mu\text{L}$  had similar sensitivity:  
44 56.8% ( $p < 0.001$ ) with a lower specificity: 84.1% ( $P = 0.166$ ). Therefore, we suggest  
45 that when CRP is not available, ANC of  $> 7 \times 10^3 / \mu\text{L}$  or NLR >2 may raise the  
46 suspicion level for an SBI, due to their similar sensitivity to CRP, though lower  
47 specificity.  
48  
49  
50  
51  
52  
53  
54  
55  
56  
57  
58  
59  
60

1  
2  
3 We have created a decision tree (Figure 4) that shows the added value of NLR to  
4  
5 CRP in assessing febrile neonates. When CRP is high ( $>46.1$  mg/L), so is the risk of  
6  
7 a SBI. In the low-CRP group ( $<46.1$  mg/L), NLR contributes to the assessment of  
8  
9 SBI risk, lowering it by as much as 58% compared to the entire low-CRP group when  
10  
11 NLR is not considered; and by 81% for neonates with  $NLR < 0.77$ , compared to  
12  
13 infants in the low-CRP group but with  $NLR > 2.4$ . Although we currently recommend  
14  
15 antibiotic treatment for all febrile neonates, these data aid in the assessment of SBI  
16  
17 risk upon admission to the ED, and may in the future, together with new markers,  
18  
19 diminish the need for antibiotic use for well-looking febrile neonates.  
20  
21  
22  
23

24  
25 ANC outperformed NLR and CRP in the prediction of invasive bacterial infection;  
26  
27 bacteremia or meningitis. This finding might be attributed to the delay in rise of CRP  
28  
29 compared to other inflammation markers. The combination of NLR with CRP, and  
30  
31 ANC with CRP, is superior to any of the single markers.  
32  
33  
34  
35

36 The strengths of this study are its large cohort, and its being the first to test NLR as a  
37  
38 diagnostic marker for bacterial infections in young infants. The study has some  
39  
40 limitations. As a retrospective study, treatment of the infants enrolled was according  
41  
42 to clinical considerations and hospital policy, and not research considerations. For  
43  
44 example, not all the older infants underwent a full sepsis workup, though all infants of  
45  
46 neonatal age did. We are, however, confident that we have not undercalled true  
47  
48 bacterial infections, since the policy at our hospital warrants at least blood and urine  
49  
50 cultures prior to the initiation of antibiotics for any young febrile infant, and CSF  
51  
52 cultures for any ill-looking one. Bacterial infections, such as bacterial pneumonia,  
53  
54 gastroenteritis and arthritis were not ruled out. However, these infections are fairly  
55  
56  
57  
58  
59  
60

1  
2  
3 rare in this age group. Due to a low number of IBIs, the analysis in the group as a  
4  
5 whole is more reflective of UTI than of meningitis or bacteremia. There was a 20%  
6  
7 rate of contaminated cultures, compared with 12-14% in studies citing urine catheter  
8  
9 specimen contamination rates alone in infants <24 months.[28-29] ]. Our study did  
10  
11 not examine procalcitonin, since our aim was to study commonly available diagnostic  
12  
13 markers.  
14  
15

16  
17  
18 In our comparison of various diagnostic markers for infections in young infants, we  
19  
20 found CRP to be a valuable marker for predicting SBI. However, CRP values are not  
21  
22 always available. We showed that ANC and NLR, which are readily available, can  
23  
24 aid, together with other markers of infection, in identifying children in the 1-week to 3-  
25  
26 month age group who are at risk of serious as well as invasive bacterial infections.  
27  
28 We showed the discriminatory ability of detecting SBI infections based on a number  
29  
30 of possible cut-off values of all tested markers, including NLR, which has not been  
31  
32 previously studied in this age group. We recommend drawing blood for all febrile  
33  
34 infants aged 3 months or less, and suggest using the cutoff values we determined,  
35  
36 as well as other available ones, to aid in the management of febrile infants. The  
37  
38 specificity of the markers studied is not sufficient to rule out bacterial infections.  
39  
40 However, due to the reasonably high sensitivity, we recommend antibiotic use for all  
41  
42 patients with one or more tests indicative of a possible bacterial infection, as well as  
43  
44 for ill-looking patients.  
45  
46  
47  
48  
49  
50  
51  
52  
53  
54  
55  
56  
57  
58  
59  
60



**What is already known on this topic**

Differentiating febrile infants with high risk for serious bacterial infection is challenging. Laboratory values such as: leukocytosis, leukopenia, the presence of leukocyturia or urinary nitrites, cerebrospinal fluid WBC-count, and more recently C-reactive protein and procalcitonin, are frequently used, yet, the discriminatory capability of these laboratory tests remains inconclusive.

**What this study adds:**

We report the discriminatory ability of a number of markers of SBI in hospitalized febrile infants aged 1 week to 3 months. The neutrophil to lymphocyte ratio was not previously studied in this age group. We determined cutoff values that could aid clinicians in the evaluation of febrile infants.

**Table 1:** Median values (IQR) for investigated diagnostic markers by age groups

| Age group     | Status  | Age        | NLR              | WBC                | CRP               | ANC               |
|---------------|---------|------------|------------------|--------------------|-------------------|-------------------|
| 7-28 days     | Non SBI | 20 (15-25) | 0.90 (0.52-1.8)  | 11.35 (8.82-14.28) | 3.93 (1.25-9.43)  | 4.3 (2.82-6.48)   |
|               | SBI     | 15 (12-19) | 2.15 (0.95-2.98) | 15.4 (10.7-21.23)  | 31.2 (6.94-66.11) | 7.45 (5.03-12.08) |
|               |         | P<0.001    | P<0.001          | P<0.001            | P<0.001           | P<0.001           |
| 29-90 days    | Non SBI | 51 (40-63) | 0.71 (0.4-1.25)  | 11.4 (8.6-14.78)   | 5.24 (1.49-12.33) | 3.6 (2.3-5.8)     |
|               | SBI     | 54 (41-61) | 0.87 (0.55-1.52) | 14 (10.1-17.9)     | 15.74 (3.78-33.7) | 5.1 (3.6-5.1)     |
|               |         | P=0.81     | P=0.008          | P=0.001            | P<0.001           | P<0.001           |
| All age group | Non SBI | 46 (32-60) | 0.74 (0.42-1.33) | 11.4 (8.6-11.4)    | 4.95 (1.48-12.1)  | 3.7 (2.4-5.98)    |
|               | SBI     | 34 (18-56) | 1.23 (0.68-2.5)  | 14.4 (10.1-18.1)   | 19.03 (5.18-50.5) | 5.8 (4.3-9.2)     |
|               |         | P<0.001    | P<0.001          | P<0.001            | P<0.001           | P<0.001           |

White Blood Cell counts (WBC); C-reactive protein (CRP); Absolute Neutrophil Count (ANC) ;  
Neutrophils to Lymphocytes Ratio (NLR)

**Table 2:** The sensitivity, specificity and likelihood ratio values of NLR, CRP and WBC for prediction of SBI in infants aged 7-28 days (95% CI)

| Parameter and threshold value     |       | Sensitivity       | Specificity       | LR+             | LR-           | PPV   | NPV   |
|-----------------------------------|-------|-------------------|-------------------|-----------------|---------------|-------|-------|
| NLR                               | >0.85 | 86.4% (74.1-94.4) | 47% (39.5-54.6)   | 1.6 (1.4-2)     | 0.3 (0.1-0.6) | 30.3% | 92.8% |
|                                   | >1    | 72.7% (58.2-83.7) | 55.5% (57.8-62.9) | 1.6 (1.3-2.1)   | 0.5 (0.3-0.8) | 30.4% | 88.3% |
|                                   | > 1.5 | 56.8% (42.2-70.3) | 67.7% (60.2-73.4) | 1.8 (1.3-2.5)   | 0.6 (0.5-0.9) | 32%   | 85.4% |
|                                   | > 2   | 52.3% (37.9-66.2) | 78% (71.1-83.7)   | 2.4 (1.6-3.6)   | 0.6 (0.4-0.8) | 38.9% | 85.9% |
|                                   | > 3   | 22.7% (12.8-37)   | 90.9% (85.5-94.4) | 2.5 (1.2-5.1)   | 0.9 (0.72-1)  | 40%   | 81.4% |
| CRP (mg/L)                        | > 5   | 79.5% (65.5-88.9) | 56.7% (49.1-64.1) | 1.8 (1.5-2.3)   | 0.4 (0.2-0.7) | 32.9% | 91.1% |
|                                   | > 20  | 54.4% (40.1-68.3) | 89% (83.3-92.9)   | 5 (3-8.3)       | 0.5 (0.4-0.7) | 56.9% | 87.9% |
|                                   | > 40  | 45.5% (31.7-59.9) | 97% (93.1-98.7)   | 14.9 (5.9-37.5) | 0.6 (0.4-0.7) | 80.2% | 86.9% |
|                                   | > 80  | 15.9% (7.9-29.3)  | 99.4% (96.6-99.9) | 26 (3.3-206.5)  | 0.9 (0.7-1)   | 87.6% | 81.5% |
| NEU ABS<br>( $10^3/\mu\text{L}$ ) | > 5   | 75% (60.6-85.4)   | 58.5% (50.9-65.8) | 1.8 (1.4-2.3)   | 0.4 (0.3-0.7) | 32.6% | 89.7% |
|                                   | > 7   | 56.8% (42.2-70.3) | 84.1% (77.8-89)   | 3.6 (2.3-5.6)   | 0.5 (0.4-0.7) | 48.9% | 87.9% |
|                                   | >10   | 34.1% (21.9-48.9) | 93.9% (89.1-96.7) | 5.6 (2.7-11.6)  | 0.7 (0.6-0.9) | 59.9% | 84.2% |
|                                   | >15   | 13.6% (6.4-26.7)  | 100% (97.7-100)   | n/a             | 0.9 (0.8-1)   | 100%  | 81.2% |
| WBC<br>( $10^3/\mu\text{LL}$ )    | >10   | 79.5% (65.5-88.9) | 39% (31.9-46.7)   | 1.3 (1.1-1.6)   | 0.5 (0.3-1)   | 25.8% | 87.7% |
|                                   | >15   | 50% (35.8-64.2)   | 78% (71.1-83.7)   | 2.3 (1.5-3.4)   | 0.6 (0.5-0.9) | 37.8% | 85.4% |
|                                   | >20   | 27.3% (16.4-41.9) | 85.7% (79.8-90.5) | 1.9 (1.1-3.6)   | 0.9 (0.7-1)   | 33.8% | 81.5% |
|                                   | >25   | 9.1% (3.6-21.2)   | 99.4% (96.6-99.9) | 14.9 (1.7-130)  | 0.9 (0.8-1)   | 80.2% | 80.3% |

**Table 3:** The sensitivity, specificity and likelihood ratio values of NLR, CRP and WBC for prediction of SBI in infants aged 29-90 days (95% CI)

| Parameter and threshold value     | Sensitivity | Specificity       | LR+               | LR-            | PPV            | NPV   |       |
|-----------------------------------|-------------|-------------------|-------------------|----------------|----------------|-------|-------|
| NLR                               | >0.85       | 52.2% (40.5-63.8) | 58.1% (54.6-61.6) | 1.3 (1-1.6)    | 0.82 (0.6-1.1) | 9.9%  | 93.2% |
|                                   | >1          | 47.8% (36.3-59.5) | 65.3% (61.9-68.6) | 1.4 (1.1-1.8)  | 0.8 (0.6-1)    | 10.8% | 93.4% |
|                                   | > 1.5       | 25.4% (16.5-36.9) | 82.7% (79.9-85.2) | 1.5 (1-2.2)    | 0.9 (0.8-1)    | 11.5% | 92.6% |
|                                   | > 2         | 16.4% (9.4-27.1)  | 89.8% (87.4-91.7) | 1.6 (0.9-2.9)  | 0.9 (0.8-1.1)  | 12.4% | 92.4% |
|                                   | > 3         | 9% (4.17-18.2)    | 96.6% (95.1-97.7) | 2.6 (1.1-6.2)  | 0.94 (0.9-1)   | 18.9% | 92.3% |
| CRP( mg/L)                        | > 5         | 74.6% (63.1-83.5) | 49% (45.4-52.5)   | 1.5 (1.3-1.7)  | 0.5 (0.3-0.8)  | 11.4% | 95.6% |
|                                   | > 20        | 44.8% (33.5-56.6) | 84.7% (82-97.1)   | 2.9 (2.1-4)    | 0.7 (0.5-0.8)  | 20.5% | 94.6% |
|                                   | > 40        | 20.9% (12.9-32.1) | 93.2% (91.2-94.8) | 3.1 (1.8-5.2)  | 0.85 (0.8-1)   | 21.3% | 93%   |
|                                   | > 80        | 7.5% (3.2-16.3)   | 98% (96.8-98.8)   | 3.8 (1.4-10.1) | 0.9 (0.9-1)    | 25%   | 92.3% |
| NEU ABS<br>( $10^3/\mu\text{L}$ ) | > 5         | 52.2% (40.5-63.8) | 68.3% (64.9-71.5) | 1.7 (1.3-2.1)  | 0.7 (0.5-0.9)  | 12.7% | 94.2% |
|                                   | > 7         | 31.3% (21.5-43.2) | 82.6% (79.7-85.1) | 1.8 (1.2-2.7)  | 0.8 (0.7-1)    | 13.7% | 93.2% |
|                                   | >10         | 13.4% (7.2-23.6)  | 94.4% (92.5-95.8) | 2.4 (1.2-4.7)  | 0.9 (0.8-1)    | 17.4% | 92.5% |
|                                   | >15         | 6% (2.4-14.3)     | 99.1% (98.1-99.6) | 6.5 (2-21.7)   | 1 (0.9-1)      | 5.5%  | 91.9% |
| WBC<br>( $10^3/\mu\text{L}$ )     | >10         | 76.1% (64.7-84.7) | 37.6% (34.2-41.1) | 1.2 (1.1-1.4)  | 0.6 (0.4-1)    | 9.7%  | 94.7% |
|                                   | >15         | 43.4% (32.1-55.2) | 76.3% (73.2-79.2) | 1.8 (1.4-2.5)  | 0.7 (0.6-0.9)  | 13.9% | 93.9% |
|                                   | >20         | 13.4% (7.2-23.6)  | 93.5% (91.5-95)   | 2.1 (1.1-4)    | 0.9 (0.8-1)    | 15.4% | 92.5% |

**Table 4:** Area under the curve for diagnostic markers by age group (95% CI)

| Age               | NLR              | WBC              | CRP              | ANC              | NEU & CRP        | NLR & CRP        |
|-------------------|------------------|------------------|------------------|------------------|------------------|------------------|
| 7-28 days (pg.38) | 0.7 (0.62-0.79)  | 0.68 (0.59-0.78) | 0.78 (0.69-0.87) | 0.74 (0.65-0.82) | 0.79 (0.7-0.88)  | 0.79 (0.70-0.88) |
| 29-90 days        | 0.6 (0.53-0.67)  | 0.63 (0.55-0.7)  | 0.67 (0.59-0.74) | 0.64 (0.57-0.71) | 0.68(0.61-0.76)  | 0.67 (0.6-0.71)  |
| All age group     | 0.66 (0.60-0.71) | 0.65 (0.59-0.71) | 0.71 (0.65-0.76) | 0.69 (0.63-0.74) | 0.73 (0.67-0.78) | 0.72 (0.66-0.78) |

For peer review only

1  
2  
3 **Figure 1:** Study population  
4  
5

6 **Figure 2 A+B:** ROC of NLR, CRP, WBC, ANC and the combinations of CRP& NLR,  
7  
8 and CRP& ANC for prediction of serious bacterial infection.  
9  
10

11  
12  
13 Figure 2A: age <28 days  
14

15 Figure 2B: age 29-90 days  
16  
17

18  
19  
20 **Figure 3:** ROC of NLR, WBC, CRP, ANC and the combinations of CRP& NLR, and  
21  
22 CRP& ANC for prediction of invasive bacterial infection.  
23  
24

25  
26  
27 **Figure 4:** Optimal cutoff values for CRP and NLR in prediction of SBI in the neonatal  
28  
29 age group.  
30  
31  
32  
33  
34  
35  
36  
37  
38  
39  
40  
41  
42  
43  
44  
45  
46  
47  
48  
49  
50  
51  
52  
53  
54  
55  
56  
57  
58  
59  
60

1  
2  
3  
4  
5  
6  
7  
8  
9  
10  
11  
12  
13  
14  
15  
16  
17  
18  
19  
20  
21  
22  
23  
24  
25  
26  
27  
28  
29  
30  
31  
32  
33  
34  
35  
36  
37  
38  
39  
40  
41  
42  
43  
44  
45  
46  
47  
48  
49  
50  
51  
52  
53  
54  
55  
56  
57  
58  
59  
60

**Acknowledgements:**

The authors thank Ms Cindy Cohen for her excellent editorial assistance, would like to thank Mmes. Luda Kurilionk, Natalia Paller and Stella Avrutin for their aid in collection of the data, and Dr. Yair Mordish for his assistance in assessment and review of the data.

**Competing Interests:**

None declared

**Funding:**

None declared

For peer review only

## References

- 1 JUDGE JM. FEVER IN THE PEDIATRIC PATIENT. *J Am Osteopath Assoc* 1965;**64**:1171–4.
- 2 Baskin MN. The Prevalence of Serious Bacterial Infections by Age in Febrile Infants During the First 3 Months of Life. *Pediatr Ann* 1993;**22**:462–6. doi:10.3928/0090-4481-19930801-06
- 3 Gomez B, Mintegi S, Bressan S, *et al.* Validation of the “Step-by-Step” Approach in the Management of Young Febrile Infants. *Pediatrics* 2016;**138**:390–6. doi:10.1542/peds.2015-4381
- 4 Dagan R, Powell KR, Hall CB, *et al.* Identification of infants unlikely to have serious bacterial infection although hospitalized for suspected sepsis. *J Pediatr* 1985;**107**:855–60. doi:10.1016/S0022-3476(85)80175-X
- 5 Biondi EA, Byington CL. Evaluation and Management of Febrile, Well-appearing Young Infants. *Infect Dis Clin North Am* 2015;**29**:575–85. doi:10.1016/j.idc.2015.05.008
- 6 Bilavsky E, Yarden-Bilavsky H, Ashkenazi S, *et al.* C-reactive protein as a marker of serious bacterial infections in hospitalized febrile infants. *Acta Paediatr* 2009;**98**:1776–80. doi:10.1111/j.1651-2227.2009.01469.x
- 7 Olaciregui I, Hernandez U, Munoz JA, *et al.* Markers that predict serious bacterial infection in infants under 3 months of age presenting with fever of unknown origin. *Arch Dis Child* 2009;**94**:501–5. doi:10.1136/adc.2008.146530
- 8 Imtiaz F, Shafique K, Mirza SS, *et al.* Neutrophil lymphocyte ratio as a measure of systemic inflammation in prevalent chronic diseases in Asian population. *Int Arch Med* 2012;**5**:2. doi:10.1186/1755-7682-5-2
- 9 Lowsby R, Gomes C, Jarman I, *et al.* Neutrophil to lymphocyte count ratio as an early indicator of blood stream infection in the emergency department. *Emerg Med J* 2015;**32**:531–4. doi:10.1136/emered-2014-204071
- 10 de Jager CPC, van Wijk PTL, Mathoera RB, *et al.* Lymphocytopenia and neutrophil-lymphocyte count ratio predict bacteremia better than conventional infection markers in an emergency care unit. *Crit Care* 2010;**14**:R192. doi:10.1186/cc9309
- 11 Liu J, Li C, Du J, *et al.* The neutrophil-to-lymphocyte ratio correlates with age in patients with papillary thyroid carcinoma. *ORL* 2015;**77**:109–16. doi:10.1159/000375534
- 12 Bekdas M, Goksugur SB, Sarac EG, *et al.* Neutrophil/lymphocyte and C-reactive protein/mean platelet volume ratios in differentiating between viral and bacterial pneumonias and diagnosing early complications in children. *Saudi Med J* 2014;**35**:442–7.
- 13 Yazici M, Özkisacik S, Onur Öztan M, *et al.* Neutrophil/lymphocyte ratio in the diagnosis of childhood appendicitis. *Turk J Pediatr* 2010;**52**:400–3.
- 14 Uluca Ü, Ece A, Şen V, *et al.* Usefulness of mean platelet volume and neutrophil-to-lymphocyte ratio for evaluation of children with Familial Mediterranean fever. *Med Sci Monit* 2014;**20**:1578–82. doi:10.12659/MSM.892139
- 15 Dallman P.R. *Rudolph, A.M. (Ed.), Pediatrics*. sixteenth. New York: : Appleton-Century-Crofts 1977.
- 16 Kass G V. An Exploratory Technique for Investigating Large Quantities of Categorical



- 1  
2  
3 Data. *Appl Stat* 1980;**29**:119. doi:10.2307/2986296
- 4  
5 17 Leo Breiman, Jerome Friedman, Charles J. Stone RAO. *Classification and regression*  
6 *trees*. Chapman & Hall 1984.
- 7  
8 18 Greenhow TL, Hung Y-Y, Herz AM, *et al*. The Changing Epidemiology of Serious  
9 Bacterial Infections in Young Infants. *Pediatr Infect Dis J* 2014;**33**:595–9.  
10 doi:10.1097/INF.0000000000000225
- 11  
12 19 Cortese F, Scicchitano P, Gesualdo M, *et al*. Early and Late Infections in Newborns:  
13 Where Do We Stand? A Review. *Pediatr Neonatol* Published Online First: 2015.  
14 doi:10.1016/j.pedneo.2015.09.007
- 15  
16 20 Hui C, Neto G, Tsertsvadze A, *et al*. Diagnosis and management of febrile infants (0-3  
17 months). *Evid Rep Technol Assess (Full Rep)* 2012;:1–  
18 297.<http://www.ncbi.nlm.nih.gov/pubmed/24422856> (accessed 18 Jun2017).
- 19  
20 21 Stuart H. Orkin MD, David E. Fisher MD, PhD, David Ginsburg MD, A. Thomas Look  
21 MD SELM and DGNM. *Nathan and Oski's Hematology and Oncology of Infancy and*  
22 *Childhood*. 8th ed. Saunders, an imprint of Elsevier Inc. 2015.
- 23  
24 22 Wesche DE, Lomas-Neira JL, Perl M, *et al*. Leukocyte apoptosis and its significance  
25 in sepsis and shock. *J Leukoc Biol* 2005;**78**:325–37. doi:10.1189/jlb.0105017
- 26  
27 23 Lai M-Y, Tsai M-H, Lee C-W, *et al*. Characteristics of neonates with culture-proven  
28 bloodstream infection who have low levels of C-reactive protein ( $\leq 10$  mg/L). *BMC*  
29 *Infect Dis* 2015;**15**:320. doi:10.1186/s12879-015-1069-7
- 30  
31 24 Hofer N, Zacharias E, Müller W, *et al*. An Update on the Use of C-Reactive Protein in  
32 Early-Onset Neonatal Sepsis: Current Insights and New Tasks. *Neonatology*  
33 2012;**102**:25–36. doi:10.1159/000336629
- 34  
35 25 Gomez B, Bressan S, Mintegi S, *et al*. Diagnostic value of procalcitonin in well-  
36 appearing young febrile infants. *Pediatrics* 2012;**130**:815–22. doi:10.1542/peds.2011-  
37 3575
- 38  
39 26 Li J, Chen Q, Luo X, *et al*. Neutrophil-to-Lymphocyte Ratio Positively Correlates to  
40 Age in Healthy Population. *J Clin Lab Anal* 2015;**29**:437–43. doi:10.1002/jcla.21791
- 41  
42 27 Gürol G, Çiftci İH, Terizi HA, *et al*. Are there standardized cutoff values for neutrophil-  
43 lymphocyte ratios in bacteremia or sepsis? *J Microbiol Biotechnol* 2015;**25**:521–  
44 5.<http://www.ncbi.nlm.nih.gov/pubmed/25341467> (accessed 13 Feb2016).
- 45  
46 28 Wingerter S, Bachur R. Risk Factors for Contamination of Catheterized Urine  
47 Specimens in Febrile Children. *Pediatr Emerg Care* 2011;**27**:1–4.  
48 doi:10.1097/PEC.0b013e3182037c20
- 49  
50 29 Tosif S, Baker A, Oakley E, *et al*. Contamination rates of different urine collection  
51 methods for the diagnosis of urinary tract infections in young children: An  
52 observational cohort study. *J Paediatr Child Health* 2012;**48**:659–64.  
53 doi:10.1111/j.1440-1754.2012.02449.x  
54  
55  
56  
57  
58  
59  
60

1  
2  
3  
4  
5  
6  
7  
8  
9  
10  
11  
12  
13  
14  
15  
16  
17  
18  
19  
20  
21  
22  
23  
24  
25  
26  
27  
28  
29  
30  
31  
32  
33  
34  
35  
36  
37  
38  
39  
40  
41  
42  
43  
44  
45  
46  
47  
48  
49  
50  
51  
52  
53  
54  
55  
56  
57  
58  
59  
60

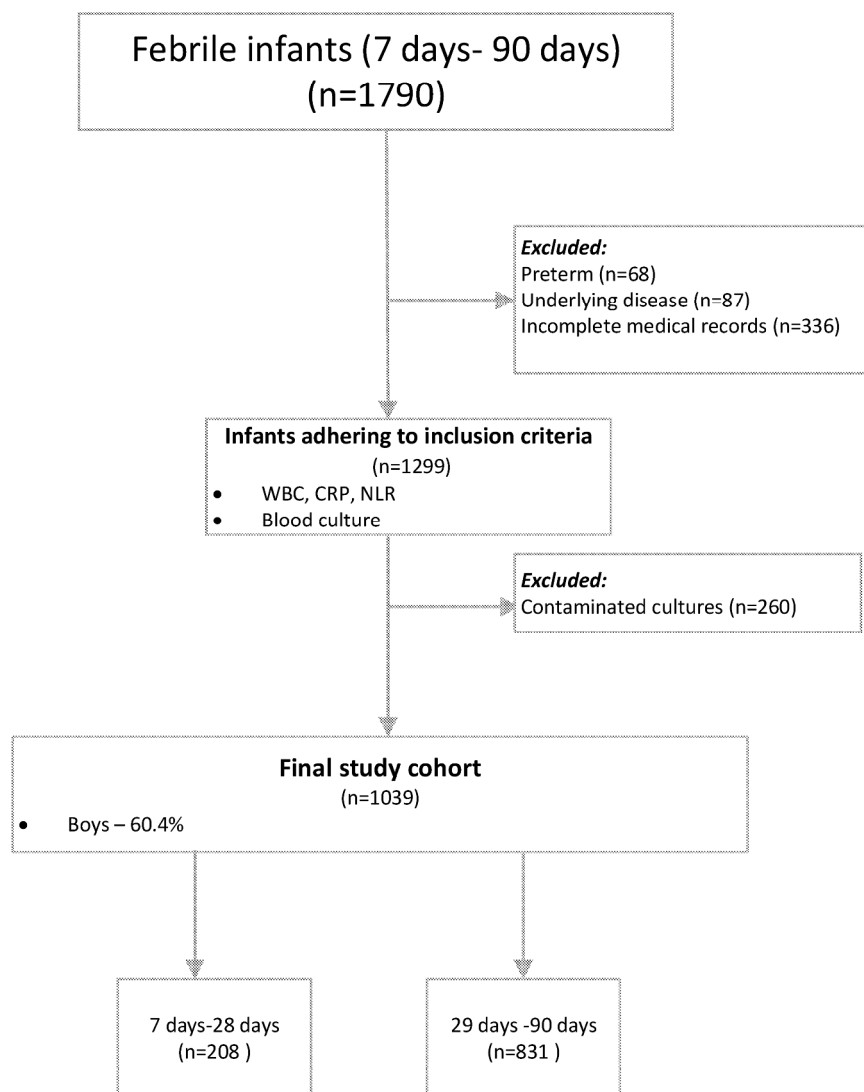

155x197mm (600 x 600 DPI)

1  
2  
3  
4  
5  
6  
7  
8  
9  
10  
11  
12  
13  
14  
15  
16  
17  
18  
19  
20  
21  
22  
23  
24  
25  
26  
27  
28  
29  
30  
31  
32  
33  
34  
35  
36  
37  
38  
39  
40  
41  
42  
43  
44  
45  
46  
47  
48  
49  
50  
51  
52  
53  
54  
55  
56  
57  
58  
59  
60

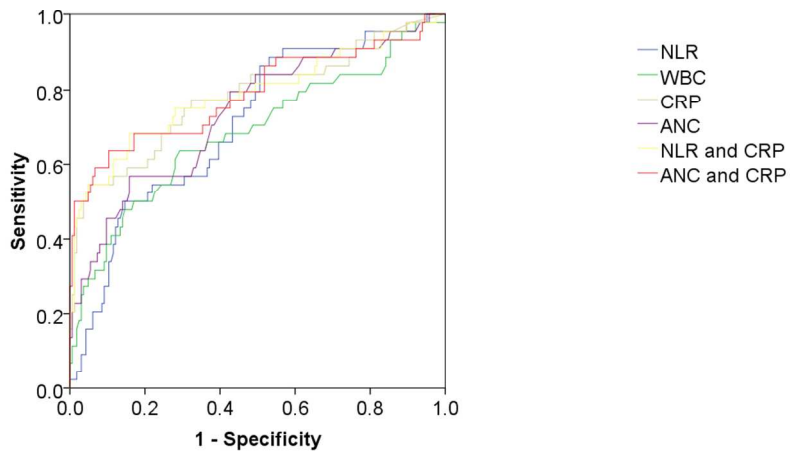

103x46mm (300 x 300 DPI)

er review only

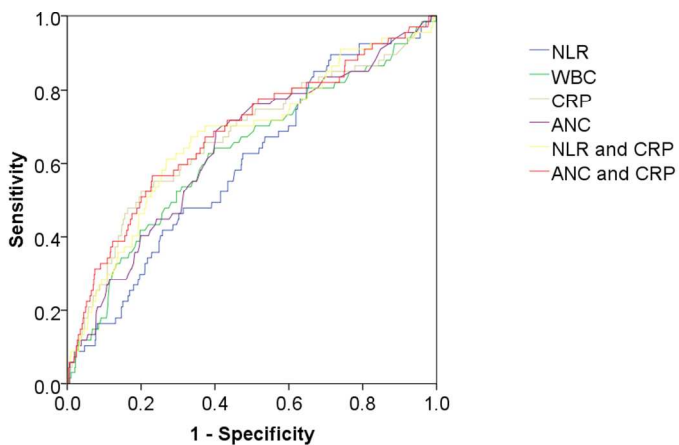

105x46mm (300 x 300 DPI)

er review only

1  
2  
3  
4  
5  
6  
7  
8  
9  
10  
11  
12  
13  
14  
15  
16  
17  
18  
19  
20  
21  
22  
23  
24  
25  
26  
27  
28  
29  
30  
31  
32  
33  
34  
35  
36  
37  
38  
39  
40  
41  
42  
43  
44  
45  
46  
47  
48  
49  
50  
51  
52  
53  
54  
55  
56  
57  
58  
59  
60

1  
2  
3  
4  
5  
6  
7  
8  
9  
10  
11  
12  
13  
14  
15  
16  
17  
18  
19  
20  
21  
22  
23  
24  
25  
26  
27  
28  
29  
30  
31  
32  
33  
34  
35  
36  
37  
38  
39  
40  
41  
42  
43  
44  
45  
46  
47  
48  
49  
50  
51  
52  
53  
54  
55  
56  
57  
58  
59  
60

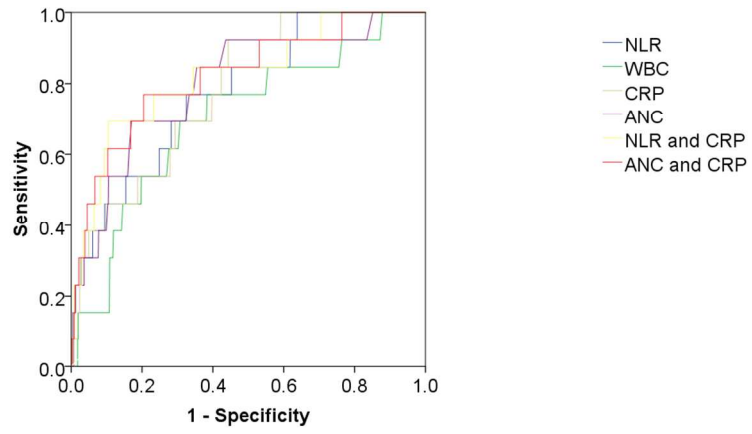

106x45mm (300 x 300 DPI)

For peer review only

1  
2  
3  
4  
5  
6  
7  
8  
9  
10  
11  
12  
13  
14  
15  
16  
17  
18  
19  
20  
21  
22  
23  
24  
25  
26  
27  
28  
29  
30  
31  
32  
33  
34  
35  
36  
37  
38  
39  
40  
41  
42  
43  
44  
45  
46  
47  
48  
49  
50  
51  
52  
53  
54  
55  
56  
57  
58  
59  
60

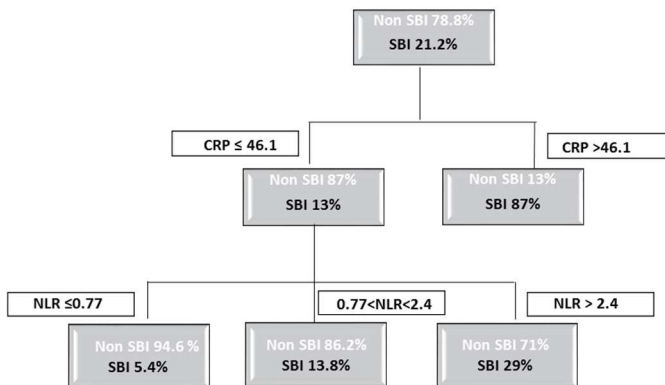

108x60mm (300 x 300 DPI)

review only

| Section & Topic          | No  | Item                                                                                                                                                   | Reported on page #     |
|--------------------------|-----|--------------------------------------------------------------------------------------------------------------------------------------------------------|------------------------|
| <b>TITLE OR ABSTRACT</b> |     |                                                                                                                                                        |                        |
|                          | 1   | Identification as a study of diagnostic accuracy using at least one measure of accuracy (such as sensitivity, specificity, predictive values, or AUC)  | 2                      |
| <b>ABSTRACT</b>          |     |                                                                                                                                                        |                        |
|                          | 2   | Structured summary of study design, methods, results, and conclusions (for specific guidance, see STARD for Abstracts)                                 | 2                      |
| <b>INTRODUCTION</b>      |     |                                                                                                                                                        |                        |
|                          | 3   | Scientific and clinical background, including the intended use and clinical role of the index test                                                     | 3                      |
|                          | 4   | Study objectives and hypotheses                                                                                                                        | 3                      |
| <b>METHODS</b>           |     |                                                                                                                                                        |                        |
| <i>Study design</i>      | 5   | Whether data collection was planned before the index test and reference standard were performed (prospective study) or after (retrospective study)     | 4                      |
| <i>Participants</i>      | 6   | Eligibility criteria                                                                                                                                   | 4                      |
|                          | 7   | On what basis potentially eligible participants were identified (such as symptoms, results from previous tests, inclusion in registry)                 | 4                      |
|                          | 8   | Where and when potentially eligible participants were identified (setting, location and dates)                                                         | 4                      |
|                          | 9   | Whether participants formed a consecutive, random or convenience series                                                                                | n/a                    |
| <i>Test methods</i>      | 10a | Index test, in sufficient detail to allow replication                                                                                                  | n/a                    |
|                          | 10b | Reference standard, in sufficient detail to allow replication                                                                                          | 4                      |
|                          | 11  | Rationale for choosing the reference standard (if alternatives exist)                                                                                  | 3                      |
|                          | 12a | Definition of and rationale for test positivity cut-offs or result categories of the index test, distinguishing pre-specified from exploratory         | 10-11                  |
|                          | 12b | Definition of and rationale for test positivity cut-offs or result categories of the reference standard, distinguishing pre-specified from exploratory | 10-11                  |
|                          | 13a | Whether clinical information and reference standard results were available to the performers/readers of the index test                                 | n/a                    |
|                          | 13b | Whether clinical information and index test results were available to the assessors of the reference standard                                          | n/a                    |
| <i>Analysis</i>          | 14  | Methods for estimating or comparing measures of diagnostic accuracy                                                                                    | 5-6                    |
|                          | 15  | How indeterminate index test or reference standard results were handled                                                                                | n/a                    |
|                          | 16  | How missing data on the index test and reference standard were handled                                                                                 | 6                      |
|                          | 17  | Any analyses of variability in diagnostic accuracy, distinguishing pre-specified from exploratory                                                      | n/a                    |
|                          | 18  | Intended sample size and how it was determined                                                                                                         | n/a                    |
| <b>RESULTS</b>           |     |                                                                                                                                                        |                        |
| <i>Participants</i>      | 19  | Flow of participants, using a diagram                                                                                                                  | Fig1                   |
|                          | 20  | Baseline demographic and clinical characteristics of participants                                                                                      | 6                      |
|                          | 21a | Distribution of severity of disease in those with the target condition                                                                                 | n/a                    |
|                          | 21b | Distribution of alternative diagnoses in those without the target condition                                                                            | n/a                    |
|                          | 22  | Time interval and any clinical interventions between index test and reference standard                                                                 | n/a                    |
| <i>Test results</i>      | 23  | Cross tabulation of the index test results (or their distribution) by the results of the reference standard                                            | n/a                    |
|                          | 24  | Estimates of diagnostic accuracy and their precision (such as 95% confidence intervals)                                                                | 15-16                  |
|                          | 25  | Any adverse events from performing the index test or the reference standard                                                                            | n/a                    |
| <b>DISCUSSION</b>        |     |                                                                                                                                                        |                        |
|                          | 26  | Study limitations, including sources of potential bias, statistical uncertainty, and generalisability                                                  | 11                     |
|                          | 27  | Implications for practice, including the intended use and clinical role of the index test                                                              | 12                     |
| <b>OTHER INFORMATION</b> |     |                                                                                                                                                        |                        |
|                          | 28  | Registration number and name of registry                                                                                                               | n/a                    |
|                          | 29  | Where the full study protocol can be accessed                                                                                                          | Personal communication |
|                          | 30  | Sources of funding and other support; role of funders                                                                                                  | n/a                    |

# BMJ Open

## Diagnostic markers of acute infections in infants aged 1 week to 3 months - a retrospective cohort study

|                                 |                                                                                                                                                                                                                                                                                                                                                                                                                                                                                                                                                                                                                                    |
|---------------------------------|------------------------------------------------------------------------------------------------------------------------------------------------------------------------------------------------------------------------------------------------------------------------------------------------------------------------------------------------------------------------------------------------------------------------------------------------------------------------------------------------------------------------------------------------------------------------------------------------------------------------------------|
| Journal:                        | <i>BMJ Open</i>                                                                                                                                                                                                                                                                                                                                                                                                                                                                                                                                                                                                                    |
| Manuscript ID                   | bmjopen-2017-018092.R1                                                                                                                                                                                                                                                                                                                                                                                                                                                                                                                                                                                                             |
| Article Type:                   | Research                                                                                                                                                                                                                                                                                                                                                                                                                                                                                                                                                                                                                           |
| Date Submitted by the Author:   | 09-Aug-2017                                                                                                                                                                                                                                                                                                                                                                                                                                                                                                                                                                                                                        |
| Complete List of Authors:       | Hamiel, Uri; Assaf Harofeh Medical Center, Pediatrics; Tel Aviv University Sackler Faculty of Medicine,<br>Bahat, Hilla; Assaf Harofeh Medical Center, Pediatrics; Tel Aviv University Sackler Faculty of Medicine<br>Kozler, Eran; Assaf Harofeh Medical Center, Emergency Department ; Tel Aviv University Sackler Faculty of Medicine<br>Hamiel, Yotam; Tel Aviv University Blavatnik School of Computer Science<br>Ziv-Baran, Tomer; Tel Aviv University, School of Public Health, Sackler Faculty of Medicine<br>Goldman, Michael; Assaf Harofeh Medical Center, Pediatrics; Tel Aviv University, Sackler Faculty of Medicine |
| <b>Primary Subject Heading</b>: | Paediatrics                                                                                                                                                                                                                                                                                                                                                                                                                                                                                                                                                                                                                        |
| Secondary Subject Heading:      | Infectious diseases                                                                                                                                                                                                                                                                                                                                                                                                                                                                                                                                                                                                                |
| Keywords:                       | INFECTIOUS DISEASES, Paediatric infectious disease & immunisation < PAEDIATRICS, ACCIDENT & EMERGENCY MEDICINE                                                                                                                                                                                                                                                                                                                                                                                                                                                                                                                     |
|                                 |                                                                                                                                                                                                                                                                                                                                                                                                                                                                                                                                                                                                                                    |

SCHOLARONE™  
Manuscripts

only



1  
2  
3 **Diagnostic markers of acute infections in infants aged 1 week to 3 months -**  
4  
5 **a retrospective cohort study**  
6  
7

8 **Uri Hamiel<sup>a,b</sup>, Hilla Bahat<sup>a,b</sup>, Eran Kozer<sup>a,b</sup>, Yotam Hamiel<sup>c</sup>,**  
9  
10 **Tomer Ziv-Baran<sup>d</sup>, Michael Goldman<sup>a,b</sup>**  
11  
12

13  
14  
15  
16  
17 <sup>a</sup>Department of Pediatrics, Assaf Harofeh Medical Centre, Zerifin, Israel.

18  
19 <sup>b</sup>Sackler School of Medicine, Tel Aviv University, Tel Aviv, Israel.

20  
21 <sup>c</sup>Blavatnik School of Computer Science, Tel Aviv University, Tel Aviv, Israel,

22  
23 <sup>d</sup>School of Public Health, Sackler Faculty of Medicine, Tel-Aviv University , Tel-Aviv,  
24  
25  
26  
27  
28  
29  
30  
31  
32  
33  
34  
35  
36  
37  
38  
39  
40  
41  
42  
43  
44  
45  
46  
47  
48  
49  
50  
51  
52  
53  
54  
55  
56  
57  
58  
59  
60  
Israel.

Correspondence to:

Uri Hamiel

Department of Pediatrics, Assaf Harofeh Medical Centre, Zerifin, 70300, Israel

[urihamiel@gmail.com](mailto:urihamiel@gmail.com), Tel: 972-89779133 Fax: 972-89779136

UH and HB contributed equally

Abbreviations: SBI: serious bacterial infection, IBI: Invasive bacterial infection, NLR: neutrophil to lymphocyte  
count ratio, ANC: absolute neutrophil count, CRP: C-reactive protein, AUC: area under the ROC curve, WBC:  
White blood count, ED: emergency department, CSF: cerebrospinal fluid, UTI: Urinary tract infections

**Word Count: 3226**

## ABSTRACT

**Objective:** History and physical examination do not reliably exclude serious bacterial infections (SBIs) in infants. We examined potential markers of SBI in young febrile infants.

**Design:** We reviewed white blood cell (WBC) count, absolute neutrophil count (ANC), neutrophil to lymphocyte count ratio (NLR), and C-Reactive Protein (CRP) in infants aged one week to 90 days, admitted for fever to one medical center during 2012-2014.

**Results:** SBI was detected in 111 (10.6%) of 1039 infants. Median values of all investigated diagnostic markers were significantly higher in infants with than without SBI: WBC (14.4 vs. 11.4 K/ $\mu$ L,  $p < 0.001$ ), ANC (5.8 vs 3.7 K/ $\mu$ L,  $p < 0.001$ ), CRP (19 vs 5 mg/L  $p < 0.001$ ) and NLR (1.2 vs 0.7,  $p < 0.001$ ).

Areas under the ROC curve (AUC) for discriminating SBI were: 0.65 (95% CI 0.59-0.71), 0.69 (95% CI 0.63-0.74), 0.71 (95% CI 0.65-0.76), and 0.66 (95% CI 0.60-0.71) for WBC, ANC, CRP and NLR, respectively. Logistic regression showed the best discriminative ability for the combination of CRP and ANC, with AUC: 0.73 (95% CI 0.67-0.78). For invasive bacterial infection, AUCs were 0.70 (95% CI 0.56-0.85), 0.80 (95% CI 0.67-0.92), 0.78 (95% CI 0.68-0.89) and 0.78 (95% CI 0.66-0.90), respectively. CRP combined with NLR or ANC were the best discriminators of infection, AUCs: 0.82 (95% CI 0.70-0.95) and 0.82 (95% CI 0.68-0.95), respectively.

**Conclusions:** Among young febrile infants, CRP was the best single discriminatory marker of SBI, and ANC was the best for invasive bacterial infection. ANC and NLR can contribute to evaluating this population.

### Strengths and limitations of this study

- This large cohort is one of only a few descriptions of bacterial epidemiology of serious bacterial infection evaluation in young febrile infants seen in the emergency department in the last 10 years.
- We determined cutoff values for a number of infection markers for the evaluation of serious bacterial infection in the 1-week to 3-months age group.
- This is the first study to examine the neutrophil to lymphocyte ratio as a diagnostic marker for bacterial infections in young infants.
- Absolute neutrophil count and the neutrophil to lymphocyte ratio are inexpensive, readily available markers that can be used in settings in which C-reactive protein is not available.
- This is a retrospective study. Not all the older infants in the study underwent a complete workup. Some fairly rare neonatal bacterial infections, such as bacterial pneumonia, gastroenteritis and arthritis were not ruled out. Only a relatively low number of invasive bacterial infections occurred in the study group.

**INTRODUCTION:**

Fever (body temperature > 38.0°C) is a common complaint in infants aged up to 3 months.[1,2] Several protocols have been developed to help clinicians differentiate infants with low risk for serious bacterial infection (SBI), who can be managed as outpatients, from those requiring treatment and hospitalization.[3–5] These protocols use primarily laboratory values such as: leukocytosis (WBC>15,000/ $\mu$ L) or leukopenia (WBC<5000/ $\mu$ L), the presence of leukocyturia or urinary nitrites, and cerebrospinal fluid (CSF) WBC-count to create a stratification of low-risk and high-risk febrile infants. The use of C-reactive protein (CRP) as a marker for SBI is in common clinical use.[6,7] Nonetheless, the prediction value of these laboratory tests remains controversial.

Neutrophil to lymphocyte ratio (NLR) is a measure of systemic inflammation.[8] In adults, NLR was found to predict bacteremia in the emergency department (ED),[9] indicate short and long-term mortalities among critically ill patients and guide prognosis in various acute infections, ischemic heart disease, metabolic diseases, cancer and other medical conditions.[10,11] In children, NLR was found to differentiate between viral and bacterial pneumonia,[12] to be a useful diagnostic marker of acute appendicitis [13] and to predict an attack of familial Mediterranean fever in children already diagnosed with this condition.[14]

The aim of this study was to assess, in hospitalized febrile infants aged 1 week to 3 months, the discriminatory ability of various, commonly available, markers of SBI, including NLR, which has not been previously studied in this age group; and to determine cutoff values that could aid clinicians in the evaluation of febrile infants.

## METHODS

### Study population

This retrospective cohort study comprised previously healthy, full-term infants ( $\geq 37$  weeks at birth), 1 week to 90 days of age, who were admitted to the ED or pediatric department of Assaf Harofeh, a tertiary medical center in Israel, during 2012-2014. Febrile infants (body temperature  $> 38^{\circ}\text{C}$ ) from whom at least a blood count, CRP test and blood culture were taken were included in the analysis. Blood was drawn from all febrile infants who were admitted to the ED. Urine and CSF cultures were taken from all neonates ( $\leq 28$  days old). Urine cultures were taken from infants aged  $> 28$  days who were to receive antibiotics. CSF cultures were taken upon clinical consideration. SBI was defined as the growth of a known pathogen in culture. Invasive bacterial infection (IBI) was determined as the presence of bacteremia or meningitis. Infants with underlying hematologic, immunologic, respiratory or other medical conditions that might involve corticosteroid or antibiotic use in the previous 72 hours were excluded from the analysis. For analysis, we divided the cohort into two age groups: neonatal ( $\leq 28$  days old) and older infants (29 to 90 days old).

### Laboratory data

The following data were collected from the medical records: complete history and physical examination, laboratory evaluation including blood counts, CRP testing, blood cultures, urine cultures and lumbar puncture. Samples were drawn by venepuncture. Blood tests were taken upon admission; when the first sample was technically unsatisfactory and tests were repeated, results of blood counts or CRP were considered only if taken within 24 hours of taking cultures. Blood cell count was performed using the Beckman coulter LH750 design (United States). If a blood

1  
2  
3 smear was performed, bands were added to the total number of neutrophils. CRP  
4  
5 serum level was measured by immunoturbidimetric assay using the Roche Cobas  
6  
7 c701 (Japan). Blood was drawn for cultures as recommended in a BACTEC-PED.  
8  
9  
10 Blood culture results were examined and identified using the microbiology database.  
11  
12 Urine cultures were obtained by transurethral bladder catheterization or suprapubic  
13  
14 aspiration.

15  
16  
17  
18 From the blood count, ANC was retrieved and NLR was calculated as the ratio of  
19  
20 neutrophils to lymphocytes. An age-adjusted NLR ratio was also created, by dividing  
21  
22 NLR by a mean NLR based on the medical literature,[15] according to age groups  
23  
24 (1-2 weeks, 2 weeks to 1 month, 1 month and older). UTI was defined as the  
25  
26 isolation of >50,000 colony forming units per milliliter of urine of a single pathogen,  
27  
28 not deemed as a contamination by a pediatric infectious specialist. Urinary analysis  
29  
30 was not considered in this study. Cultures with more than one isolate were  
31  
32 considered to be contaminated. Blood cultures were considered contaminated by  
33  
34 pathogens and by the clinical course of the patient, following review of a pediatric  
35  
36 infectious specialist. Patients were either discharged home from the ED or  
37  
38 hospitalized at the pediatric department. The study was approved by the local  
39  
40 institutional ethics review board.  
41  
42  
43  
44  
45  
46

### 47 **Statistical Analysis**

48  
49 Statistical analyses were performed using SPSS (IBM Corp. Released 2015. IBM  
50  
51 SPSS Statistics for Windows, Version 23.0. Armonk, NY: IBM Corp.). All tests were  
52  
53 two-sided, and values of  $P < 0.05$  were considered statistically significant. Descriptive  
54  
55 statistics are presented as numbers and percentages for categorical variables, and  
56  
57  
58  
59  
60

1  
2  
3 as means and standard deviations (SD), or medians and interquartile ranges (IQR).  
4  
5 Continuous variables were evaluated for normal distribution using histogram.  
6  
7 Categorical variables were compared by  $\chi^2$  test or Fisher exact, and continuous  
8  
9 variables were compared by t test or Mann-Whitney test, as appropriate. Univariate  
10  
11 logistic regression was used to evaluate the association of age, sex and blood tests  
12  
13 with SBI. Logistic regression was used to evaluate the probability of having SBI. The  
14  
15 multivariate logistic regression included the infection markers studied, and the  
16  
17 probability calculated was the basis for the ROC curve analysis. The discriminative  
18  
19 ability of each studied predictor was observed using the area under the receiver  
20  
21 operating characteristic curve (AUC). Chi-squared Automatic Interaction Detection  
22  
23 (CHAID) [16] and Classification and Regression Trees (CART) [17] were used to  
24  
25 identify threshold values of blood tests for SBI. Sensitivity, specificity, positive  
26  
27 likelihood ratio, negative likelihood ratio, positive predicted values and negative  
28  
29 predicted values were reported.  
30  
31  
32  
33  
34  
35

## 36 RESULTS

37  
38 During the study period, 1790 febrile infants aged 7 to 90 days were admitted to the  
39  
40 ED or pediatric department. Of them, 68 preterm infants, 87 with underlying disease  
41  
42 and 336 with incomplete medical records were excluded from the analysis.  
43  
44 Incomplete medical records were mainly due to the absence of one of the following:  
45  
46 a blood count within 24 hours of blood cultures, a CRP value, a blood culture, or any  
47  
48 bacterial culture in the neonatal age group. Of 1299 patients who met the inclusion  
49  
50 criteria, 260 were excluded since their cultures were considered contaminated, as  
51  
52 detailed below (Figure 1). There were no statistically significant differences in the  
53  
54 mean values of any of the markers studied, between those with contaminated  
55  
56  
57  
58  
59  
60

1  
2  
3 cultures and those without an SBI ( $p>0.05$ ). Females and younger infants were more  
4  
5 likely to have contaminated cultures ( $p<0.01$ ). Since no statistically significant  
6  
7 differences were found between the contaminated and the non-SBI groups, we  
8  
9 decided to exclude the contaminated cultures so as to avoid misclassification bias.  
10

11  
12  
13  
14 The final study cohort comprised 1039 infants; of them, 208 (20%) were neonates  
15  
16 (ages 7-28 days old). In addition to blood cultures, urine culture results were  
17  
18 available for 827 infants, and CSF cultures for 587.  
19

20  
21  
22  
23 SBI was detected in 111 (10.6%) infants. Infants with SBI tended to be younger,  
24  
25 median 34 (IQR 18-56) vs 46 (IQR 32-60) days,  $p<0.001$ . Boys comprised 60.4% of  
26  
27 the febrile infants but only 54% of the infants with SBI. UTI was detected in 104  
28  
29 (10%) infants, bacteremia in 11 (1.1%) and meningitis in 2 (0.2%). Four of the  
30  
31 patients with UTI had concurrent bacteremia and two had concurrent meningitis. UTI  
32  
33 was the most common SBI (94%). *Escherichia coli* was the most common pathogen,  
34  
35 detected in 74 (71.1%) of the UTIs; followed by *klebsiella pneumoniae* in 13 (12.5%),  
36  
37 and *enterococcus faecalis* in 8 (7.6%).  
38  
39

40  
41  
42 Median values of all the diagnostic markers investigated were significantly higher in  
43  
44 patients with than without SBI: WBC count (14.4 vs. 11.4  $K/\mu L$   $p<0.001$ ), ANC (5.8  
45  
46 vs 3.7 $K/\mu L$   $p<0.001$ ), CRP (19 vs 5 mg/L  $p<0.001$ ) and NLR (1.2 vs 0.7)  $p<0.001$   
47  
48 (Table 1). There was no statistically significant difference in the assessment of SBI  
49  
50 between the unadjusted NLR ratio and the adjusted for age NLR ratio.  
51

52  
53 Tables 2 and 3 show sensitivities, specificities and ratio values of WBC, CRP and  
54  
55 NLR, for cutoff values that were arbitrarily chosen either due to their common use in  
56  
57 clinical practice or to their ease of use (for example in the case of NLR), for the  
58  
59 discrimination of SBI. AUCs for the discrimination of SBI were 0.65 (95% CI: 0.6-  
60



1  
2  
3 0.71), 0.69 (95% CI 0.63-0.74), 0.71 (95% CI 0.65-0.76) and 0.66 (95% CI 0.6-0.71)  
4 for WBC, ANC, CRP and NLR, respectively. CRP combined with ANC or NLR  
5 showed the best discriminatory values for a SBI: AUC of 0.73 (95% CI 0.67-0.78)  
6 and 0.72 (95% CI 0.66-0.78), respectively (Table 4 and Figure 2).  
7  
8  
9

10  
11  
12 In an analysis of infants with an IBI such as bacteremia or meningitis, the ANC, CRP  
13 and NLR performed similarly as discriminatory factors, with AUC of 0.80 (95% CI  
14 0.67-0.92), 0.78 (95% CI 0.68-0.89) and 0.78 (95% CI 0.66-0.90), respectively,  
15 compared to AUC 0.70 (95% CI 0.56-0.85) for WBC. The combinations of CRP with  
16 NLR and with ANC were the best discriminators of bacterial infection: AUCs of 0.82  
17 (95% CI 0.70-0.95) and 0.82 (95% CI 0.68-0.95), respectively. (Table 4, Figure 3)  
18  
19  
20  
21  
22  
23  
24  
25

26  
27 All neonatal infants (aged <28 days) had undergone a full sepsis workup (CSF, blood  
28 and urine cultures were obtained); 44 infants (21.1%) had at least one positive  
29 culture. All mean investigated diagnostic markers were significantly higher in patients  
30 with than without SBI (Table 1). The sensitivity and specificity of NLR, CRP and  
31 WBC for discriminating SBI tended to be greater for the younger than the older age  
32 group (Tables 2 and 3).  
33  
34  
35  
36  
37  
38  
39  
40  
41  
42

43 CRP combined with either ANC or NLR increased the discrimination of a SBI,  
44 compared to CRP alone (AUC 0.78 to AUC 0.79) in the neonatal age group. The  
45 combination of optimal cutoff values for CRP and NLR in identifying a SBI is depicted  
46 in a decision tree (Figure 4). For the neonatal age group, the overall SBI rate was  
47 21.2%. For infants with CRP>46.1 mg/L (11% of the neonates), the risk for a SBI  
48 was 87%, compared to 13% for those with CRP<46.1 mg/L. Using a cutoff point of  
49 NLR<2.4 we found that infants with CRP<46.1 mg/L and NLR<2.4 have a risk of  
50  
51  
52  
53  
54  
55  
56  
57  
58  
59  
60

1  
2  
3 9.7% for a SBI, compared with a 29% risk for those with NLR>2.4. The risk is further  
4  
5 reduced to 5.4% for infants with NLR<0.77.  
6  
7

## 8 9 **DISCUSSION**

10  
11 Our data reveal that NLR, ANC and CRP performed better in discriminating SBI in  
12  
13 the neonatal age group than among older infants. CRP was found to be the single  
14  
15 best indicator for discriminating a non-invasive SBI in both the neonates and older  
16  
17 infants. In the absence of CRP, the markers ANC and NLR have similar sensitivity  
18  
19 for identifying serious bacterial disease, especially in neonates. Both were similar as  
20  
21 indicators for discriminating an IBI in infants younger than 3 months of age. The  
22  
23 composite of ANC with CRP, or NLR with CRP, outperforms any of the single  
24  
25 studied markers for SBI or IBI.  
26  
27  
28

29  
30  
31  
32 In the United States, the incidence rate of all SBIs in infants younger than 90 days  
33  
34 was estimated at 3.75/1000 full-term infants.[18] Bacterial infection still represents an  
35  
36 important cause of morbidity and mortality among young infants.[19] Our results  
37  
38 concur with other large studies that reported SBI to be ultimately diagnosed in about  
39  
40 10% of febrile infants in this age group.[20] Differentiating between bacterial and viral  
41  
42 infections in young infants is of utmost importance. Failure to identify bacterial  
43  
44 pathogens may lead to delayed initiation of therapy and severe illness on one hand;  
45  
46 or to prolonged and unnecessary therapy and the emergence of resistant  
47  
48 microorganisms on the other hand. Several clinical and laboratory parameters are  
49  
50 generally considered together to diagnose SBIs in this age group, although the  
51  
52 optimal combination has not been determined.[5]  
53  
54  
55  
56  
57  
58  
59  
60

1  
2  
3 The early hyperdynamic phase of infection is characterized by a proinflammatory  
4 state and mediated by neutrophils, macrophages and monocytes, with the release of  
5 inflammatory cytokines. The onset of acute neutrophilia is associated with the  
6 generation of endotoxin, TNF, IL-1, IL-8 and hematopoietic growth factors such as  
7 G-CSF. Maximal response usually occurs within 4 to 24 hours of exposure to these  
8 agents and probably results from the release of neutrophils from the marrow into  
9 circulation.[21] The systemic inflammatory response is also associated with  
10 suppression of neutrophil apoptosis and increase in lymphocyte apoptosis.[22]  
11  
12  
13  
14  
15  
16  
17  
18  
19  
20  
21  
22

23 To the best of our knowledge this is the first study to assess NLR as a diagnostic  
24 marker of bacterial infection in febrile young infants. In this large cohort of young  
25 febrile infants, we found that those with a SBI had statistically significant higher  
26 mean values of WBC, ANC, NLR and CRP. Of these markers, CRP was the best  
27 discriminatory parameter for a SBI. These findings concur with the results of another  
28 prospective Israeli study that found CRP to be a valuable laboratory test in the  
29 assessment of febrile infants aged <3 months old.[6] However, in other studies,  
30 plasma CRP level was found to inadequately predict serious bacterial infection in  
31 neonates. In a study conducted in Taiwan, CRP level was not elevated at the onset  
32 of clinical sepsis in approximately one-fourth of the cases of SBI in neonates.[23]  
33 The low sensitivity of CRP may be due to its delayed elevation; an estimated 6-12  
34 hours is needed for a significant increase.[24] This is especially relevant in young  
35 febrile infants who usually arrive to the ED soon after the onset of fever. Thus, the  
36 identification of other predictors for neonatal sepsis is important. There is no one  
37 acceptable cutoff value of CRP for assessing an SBI in the febrile infant; however,  
38 studies use the cutoff values of 40 and 20 mg/L to rule in and rule out an SBI  
39  
40  
41  
42  
43  
44  
45  
46  
47  
48  
49  
50  
51  
52  
53  
54  
55  
56  
57  
58  
59  
60

1  
2  
3 respectively.[25]  
4  
5  
6

7 WBC parameters are known to vary with age. NLR was shown to be positively  
8 associated with age in a healthy population,[26] with the lowest NLR found in the  
9 youngest age group (age<20 years, mean 16 years). The mean value in this age  
10 group was  $1.53\pm 0.56$ . We did not find any report of normal ranges of NLR values for  
11 healthy neonatal or pediatric populations, though mean values for neutrophils vs  
12 lymphocytes as components of the WBC are 41% vs. 45% at 1 week of age, 40% vs.  
13 48% at 2 weeks, 35% vs. 56% at 1 month and 32% vs. 61% at 6 months.[15] This  
14 suggests a mean NLR value of between 0.52-0.91 for healthy children in the studied  
15 age group. Due to the significant changes in neutrophil and lymphocyte counts from  
16 birth to young adulthood, cutoff values used to distinguish infections in adults differ  
17 from those that we identified for young infants. An NLR cutoff value of >5, when  
18 sufficient exclusion criteria are used, was suggested for detecting bacteremia or  
19 sepsis in adults.[27]  
20  
21  
22  
23  
24  
25  
26  
27  
28  
29  
30  
31  
32  
33  
34  
35  
36  
37

38 Hosmer and Lemeshow suggest that areas under the ROC curve of 0.70 to 0.80  
39 offer 'acceptable' discrimination, 0.80 to 0.90 'excellent' discrimination and 0.9 or  
40 above offer 'outstanding' discrimination.[28] Thus, in assessment of SBI, values of  
41 ANC (AUC 0.69) and CRP (AUC 0.71), along with the combinations of CRP with  
42 either ANC (AUC 0.73) or NLR (0.72), offer similarly 'acceptable' discriminative  
43 ability. In assessing IBI, values of CRP, ANC and NLR, as well as the combination of  
44 CRP with either NLR or ANC, similarly offer 'excellent' or close to excellent  
45 discriminations. In the neonatal age group, all markers mentioned above meet the  
46 'acceptable' criterion. Due to the ease of use of the single biomarkers compared to  
47  
48  
49  
50  
51  
52  
53  
54  
55  
56  
57  
58  
59  
60

1  
2  
3 the combinations, and the similarity of their discriminative abilities, we recommend  
4  
5 clinicians to use the markers separately rather than creating a combined score.  
6  
7

8  
9  
10 Among our neonates, a NLR of 2 did not show statistically different sensitivity from a  
11  
12 CRP value of 40 mg/L (52.3% vs 45.5%  $p < 0.001$ ), though it had lower specificity  
13  
14 (78% vs 97%  $p = 0.67$ ) in distinguishing a SBI in the neonatal age group. Likewise,  
15  
16 compared to the CRP value of 40 mg/L, an ANC of  $7 \times 10^3/\mu\text{L}$  had similar sensitivity:  
17  
18 56.8% ( $p < 0.001$ ) with a lower specificity: 84.1% ( $P = 0.166$ ). Therefore, we suggest  
19  
20 that when CRP is not available, ANC of  $>7 \times 10^3/\mu\text{L}$  or NLR  $>2$  may raise the  
21  
22 suspicion level for an SBI, due to their similar sensitivity to CRP, though lower  
23  
24  
25 specificity.  
26  
27

28  
29  
30 In our search for non-intuitive cutoff values, we created a decision tree (Figure 4)  
31  
32 that shows the added value of NLR to CRP in assessing febrile neonates. When  
33  
34 CRP is high ( $>46.1$  mg/L), so is the risk of a SBI. In the low-CRP group ( $<46.1$  mg/L),  
35  
36 NLR contributes to the assessment of SBI risk, lowering it by as much as 58%  
37  
38 compared to the entire low-CRP group when NLR is not considered; and by 81% for  
39  
40 neonates with NLR  $< 0.77$ , compared to infants in the low-CRP group but with  
41  
42 NLR  $>2.4$ . Although we currently recommend antibiotic treatment for all febrile  
43  
44 neonates, these data aid in the assessment of SBI risk upon admission to the ED,  
45  
46 and may in the future, together with new markers, diminish the need for antibiotic  
47  
48 use for well-looking febrile neonates.  
49  
50  
51

52  
53  
54 ANC outperformed NLR and CRP in the discrimination of invasive bacterial infection;  
55  
56 bacteremia or meningitis. This finding might be attributed to the delay in rise of CRP  
57  
58  
59  
60

1  
2  
3 compared to other inflammation markers. The combination of NLR with CRP, and  
4  
5 ANC with CRP, is superior to any of the single markers.  
6  
7

8  
9  
10 The strengths of this study are its large cohort, and its being the first to test NLR as a  
11  
12 diagnostic marker for bacterial infections in young infants. The study has some  
13  
14 limitations. As a retrospective study, treatment of the infants enrolled was according  
15  
16 to clinical considerations and hospital policy, and not research considerations. For  
17  
18 example, not all the older infants underwent a full sepsis workup, though all infants of  
19  
20 neonatal age did. We are, however, confident that we have not undercalled true  
21  
22 bacterial infections, since the policy at our hospital warrants at least blood and urine  
23  
24 cultures prior to the initiation of antibiotics for any young febrile infant, and CSF  
25  
26 cultures for any ill-looking one. Bacterial infections, such as bacterial pneumonia,  
27  
28 gastroenteritis and arthritis were not ruled out. However, these infections are fairly  
29  
30 rare in this age group. Due to a low number of IBIs, the analysis in the group as a  
31  
32 whole is more reflective of UTI than of meningitis or bacteremia. There was a 20%  
33  
34 rate of contaminated cultures, compared with 12-14% in studies citing urine catheter  
35  
36 specimen contamination rates alone in infants <24 months.[29,30]. Our study did not  
37  
38 examine procalcitonin, since our aim was to study commonly available diagnostic  
39  
40 markers.  
41  
42  
43  
44  
45  
46

47  
48 In our comparison of various diagnostic markers for infections in young infants, we  
49  
50 found CRP to be a valuable marker for discriminating SBI. However, CRP values are  
51  
52 not always available. We showed that ANC and NLR, which are readily available,  
53  
54 can aid, together with other markers of infection, in identifying children in the 1-week  
55  
56 to 3-month age group who are at risk of serious as well as invasive bacterial  
57  
58  
59  
60

1  
2  
3 infections. We showed the discriminatory ability of detecting SBI infections based on  
4  
5 a number of possible cut-off values of all tested markers, including NLR, which has  
6  
7 not been previously studied in this age group. We recommend drawing blood for all  
8  
9 febrile infants aged 3 months or less, and suggest using the cutoff values we  
10  
11 determined, as well as other available ones, to aid in the management of febrile  
12  
13 infants. The specificity of the markers studied is not sufficient to rule out bacterial  
14  
15 infections. However, due to the reasonably high sensitivity, we recommend antibiotic  
16  
17 use for all patients with one or more tests indicative of a possible bacterial infection,  
18  
19 as well as for ill-looking patients.  
20  
21  
22  
23  
24  
25  
26  
27  
28  
29  
30  
31  
32  
33  
34  
35  
36  
37  
38  
39  
40  
41  
42  
43  
44  
45  
46  
47  
48  
49  
50  
51  
52  
53  
54  
55  
56  
57  
58  
59  
60

**What is already known on this topic**

Differentiating febrile infants with high risk for serious bacterial infection is challenging. Laboratory values such as: leukocytosis, leukopenia, the presence of leukocyturia or urinary nitrites, cerebrospinal fluid WBC-count, and more recently C-reactive protein and procalcitonin, are frequently used, yet, the discriminatory capability of these laboratory tests remains inconclusive.

**What this study adds:**

We report the discriminatory ability of a number of markers of SBI in hospitalized febrile infants aged 1 week to 3 months. The neutrophil to lymphocyte ratio was not previously studied in this age group. We determined cutoff values that could aid clinicians in the evaluation of febrile infants.



**Table 1:** Median values (IQR) for investigated diagnostic markers by age groups

| Age group     | Status  | Age        | NLR              | WBC                | CRP               | ANC               |
|---------------|---------|------------|------------------|--------------------|-------------------|-------------------|
| 7-28 days     | Non SBI | 20 (15-25) | 0.90 (0.52-1.8)  | 11.35 (8.82-14.28) | 3.93 (1.25-9.43)  | 4.3 (2.82-6.48)   |
|               | SBI     | 15 (12-19) | 2.15 (0.95-2.98) | 15.4 (10.7-21.23)  | 31.2 (6.94-66.11) | 7.45 (5.03-12.08) |
|               |         | P<0.001    | P<0.001          | P<0.001            | P<0.001           | P<0.001           |
| 29-90 days    | Non SBI | 51 (40-63) | 0.71 (0.4-1.25)  | 11.4 (8.6-14.78)   | 5.24 (1.49-12.33) | 3.6 (2.3-5.8)     |
|               | SBI     | 54 (41-61) | 0.87 (0.55-1.52) | 14 (10.1-17.9)     | 15.74 (3.78-33.7) | 5.1 (3.6-5.1)     |
|               |         | P=0.81     | P=0.008          | P=0.001            | P<0.001           | P<0.001           |
| All age group | Non SBI | 46 (32-60) | 0.74 (0.42-1.33) | 11.4 (8.6-11.4)    | 4.95 (1.48-12.1)  | 3.7 (2.4-5.98)    |
|               | SBI     | 34 (18-56) | 1.23 (0.68-2.5)  | 14.4 (10.1-18.1)   | 19.03 (5.18-50.5) | 5.8 (4.3-9.2)     |
|               |         | P<0.001    | P<0.001          | P<0.001            | P<0.001           | P<0.001           |

White Blood Cell counts (WBC); C-reactive protein (CRP); Absolute Neutrophil Count (ANC) ;  
Neutrophils to Lymphocytes Ratio (NLR)

**Table 2:** The sensitivity, specificity and likelihood ratio values of NLR, CRP and WBC for discrimination of SBI in infants aged 7-28 days (95% CI)

| Parameter and threshold value     |       | Sensitivity       | Specificity       | LR+             | LR-           | PPV   | NPV   |
|-----------------------------------|-------|-------------------|-------------------|-----------------|---------------|-------|-------|
| NLR                               | >0.85 | 86.4% (74.1-94.4) | 47% (39.5-54.6)   | 1.6 (1.4-2)     | 0.3 (0.1-0.6) | 30.3% | 92.8% |
|                                   | >1    | 72.7% (58.2-83.7) | 55.5% (57.8-62.9) | 1.6 (1.3-2.1)   | 0.5 (0.3-0.8) | 30.4% | 88.3% |
|                                   | > 1.5 | 56.8% (42.2-70.3) | 67.7% (60.2-73.4) | 1.8 (1.3-2.5)   | 0.6 (0.5-0.9) | 32%   | 85.4% |
|                                   | > 2   | 52.3% (37.9-66.2) | 78% (71.1-83.7)   | 2.4 (1.6-3.6)   | 0.6 (0.4-0.8) | 38.9% | 85.9% |
|                                   | > 3   | 22.7% (12.8-37)   | 90.9% (85.5-94.4) | 2.5 (1.2-5.1)   | 0.9 (0.72-1)  | 40%   | 81.4% |
| CRP (mg/L)                        | > 5   | 79.5% (65.5-88.9) | 56.7% (49.1-64.1) | 1.8 (1.5-2.3)   | 0.4 (0.2-0.7) | 32.9% | 91.1% |
|                                   | > 20  | 54.4% (40.1-68.3) | 89% (83.3-92.9)   | 5 (3-8.3)       | 0.5 (0.4-0.7) | 56.9% | 87.9% |
|                                   | > 40  | 45.5% (31.7-59.9) | 97% (93.1-98.7)   | 14.9 (5.9-37.5) | 0.6 (0.4-0.7) | 80.2% | 86.9% |
|                                   | > 80  | 15.9% (7.9-29.3)  | 99.4% (96.6-99.9) | 26 (3.3-206.5)  | 0.9 (0.7-1)   | 87.6% | 81.5% |
| NEU ABS<br>( $10^3/\mu\text{L}$ ) | > 5   | 75% (60.6-85.4)   | 58.5% (50.9-65.8) | 1.8 (1.4-2.3)   | 0.4 (0.3-0.7) | 32.6% | 89.7% |
|                                   | > 7   | 56.8% (42.2-70.3) | 84.1% (77.8-89)   | 3.6 (2.3-5.6)   | 0.5 (0.4-0.7) | 48.9% | 87.9% |
|                                   | >10   | 34.1% (21.9-48.9) | 93.9% (89.1-96.7) | 5.6 (2.7-11.6)  | 0.7 (0.6-0.9) | 59.9% | 84.2% |
|                                   | >15   | 13.6% (6.4-26.7)  | 100% (97.7-100)   | n/a             | 0.9 (0.8-1)   | 100%  | 81.2% |
| WBC<br>( $10^3/\mu\text{LL}$ )    | >10   | 79.5% (65.5-88.9) | 39% (31.9-46.7)   | 1.3 (1.1-1.6)   | 0.5 (0.3-1)   | 25.8% | 87.7% |
|                                   | >15   | 50% (35.8-64.2)   | 78% (71.1-83.7)   | 2.3 (1.5-3.4)   | 0.6 (0.5-0.9) | 37.8% | 85.4% |
|                                   | >20   | 27.3% (16.4-41.9) | 85.7% (79.8-90.5) | 1.9 (1.1-3.6)   | 0.9 (0.7-1)   | 33.8% | 81.5% |
|                                   | >25   | 9.1% (3.6-21.2)   | 99.4% (96.6-99.9) | 14.9 (1.7-130)  | 0.9 (0.8-1)   | 80.2% | 80.3% |

**Table 3:** The sensitivity, specificity and likelihood ratio values of NLR, CRP and WBC for discrimination of SBI in infants aged 29-90 days (95% CI)

| Parameter and threshold value     | Sensitivity | Specificity       | LR+               | LR-            | PPV            | NPV   |       |
|-----------------------------------|-------------|-------------------|-------------------|----------------|----------------|-------|-------|
| NLR                               | >0.85       | 52.2% (40.5-63.8) | 58.1% (54.6-61.6) | 1.3 (1-1.6)    | 0.82 (0.6-1.1) | 9.9%  | 93.2% |
|                                   | >1          | 47.8% (36.3-59.5) | 65.3% (61.9-68.6) | 1.4 (1.1-1.8)  | 0.8 (0.6-1)    | 10.8% | 93.4% |
|                                   | > 1.5       | 25.4% (16.5-36.9) | 82.7% (79.9-85.2) | 1.5 (1-2.2)    | 0.9 (0.8-1)    | 11.5% | 92.6% |
|                                   | > 2         | 16.4% (9.4-27.1)  | 89.8% (87.4-91.7) | 1.6 (0.9-2.9)  | 0.9 (0.8-1.1)  | 12.4% | 92.4% |
|                                   | > 3         | 9% (4.17-18.2)    | 96.6% (95.1-97.7) | 2.6 (1.1-6.2)  | 0.94 (0.9-1)   | 18.9% | 92.3% |
| CRP( mg/L)                        | > 5         | 74.6% (63.1-83.5) | 49% (45.4-52.5)   | 1.5 (1.3-1.7)  | 0.5 (0.3-0.8)  | 11.4% | 95.6% |
|                                   | > 20        | 44.8% (33.5-56.6) | 84.7% (82-97.1)   | 2.9 (2.1-4)    | 0.7 (0.5-0.8)  | 20.5% | 94.6% |
|                                   | > 40        | 20.9% (12.9-32.1) | 93.2% (91.2-94.8) | 3.1 (1.8-5.2)  | 0.85 (0.8-1)   | 21.3% | 93%   |
|                                   | > 80        | 7.5% (3.2-16.3)   | 98% (96.8-98.8)   | 3.8 (1.4-10.1) | 0.9 (0.9-1)    | 25%   | 92.3% |
| NEU ABS<br>( $10^3/\mu\text{L}$ ) | > 5         | 52.2% (40.5-63.8) | 68.3% (64.9-71.5) | 1.7 (1.3-2.1)  | 0.7 (0.5-0.9)  | 12.7% | 94.2% |
|                                   | > 7         | 31.3% (21.5-43.2) | 82.6% (79.7-85.1) | 1.8 (1.2-2.7)  | 0.8 (0.7-1)    | 13.7% | 93.2% |
|                                   | >10         | 13.4% (7.2-23.6)  | 94.4% (92.5-95.8) | 2.4 (1.2-4.7)  | 0.9 (0.8-1)    | 17.4% | 92.5% |
|                                   | >15         | 6% (2.4-14.3)     | 99.1% (98.1-99.6) | 6.5 (2-21.7)   | 1 (0.9-1)      | 5.5%  | 91.9% |
| WBC<br>( $10^3/\mu\text{L}$ )     | >10         | 76.1% (64.7-84.7) | 37.6% (34.2-41.1) | 1.2 (1.1-1.4)  | 0.6 (0.4-1)    | 9.7%  | 94.7% |
|                                   | >15         | 43.4% (32.1-55.2) | 76.3% (73.2-79.2) | 1.8 (1.4-2.5)  | 0.7 (0.6-0.9)  | 13.9% | 93.9% |
|                                   | >20         | 13.4% (7.2-23.6)  | 93.5% (91.5-95)   | 2.1 (1.1-4)    | 0.9 (0.8-1)    | 15.4% | 92.5% |

**Table 4:** Area under the curve for SBI and IBI for diagnostic markers, by age group (95% CI)

|     | Age               | NLR              | WBC              | CRP              | ANC              | NEU & CRP        | NLR & CRP        |
|-----|-------------------|------------------|------------------|------------------|------------------|------------------|------------------|
| SBI | 7-28 days (pg.38) | 0.7 (0.62-0.79)  | 0.68 (0.59-0.78) | 0.78 (0.69-0.87) | 0.74 (0.65-0.82) | 0.79 (0.7-0.88)  | 0.79 (0.70-0.88) |
|     | 29-90 days        | 0.6 (0.53-0.67)  | 0.63 (0.55-0.7)  | 0.67 (0.59-0.74) | 0.64 (0.57-0.71) | 0.68(0.61-0.76)  | 0.67 (0.6-0.71)  |
|     | All age group     | 0.66 (0.60-0.71) | 0.65 (0.59-0.71) | 0.71 (0.65-0.76) | 0.69 (0.63-0.74) | 0.73 (0.67-0.78) | 0.72 (0.66-0.78) |
| IBI | All age group     | 0.78 (0.66-0.9)  | 0.7 (0.56-0.85)  | 0.78 (0.68-0.89) | 0.80 (0.67-0.92) | 0.82 (0.68-0.95) | 0.82 (0.7-0.95)  |

For peer review only

1  
2  
3 **Figure 1:** Study population  
4  
5

6 **Figure 2 A+B:** ROC of NLR, CRP, WBC, ANC and the combinations of CRP& NLR,  
7  
8 and CRP& ANC for discrimination of serious bacterial infection.  
9  
10

11  
12  
13 Figure 2A (Left): age <28 days  
14

15 Figure 2B (Right): age 29-90 days  
16  
17

18  
19 **Figure 3:** ROC of NLR, WBC, CRP, ANC and the combinations of CRP& NLR, and  
20  
21 CRP& ANC for discrimination of invasive bacterial infection.  
22  
23  
24

25  
26 **Figure 4:** Optimal cutoff values for CRP and NLR in discrimination of SBI in the  
27  
28 neonatal age group.  
29  
30  
31  
32  
33  
34  
35  
36  
37  
38  
39  
40  
41  
42  
43  
44  
45  
46  
47  
48  
49  
50  
51  
52  
53  
54  
55  
56  
57  
58  
59  
60

**Acknowledgements:**

The authors thank Ms Cindy Cohen for her excellent editorial assistance, would like to thank Mmes. Luda Kurilionk, Natalia Paller and Stella Avrutin for their aid in collection of the data, and Dr. Yair Mordish for his assistance in assessment and review of the data.

**Contributorship Statement:**

UH and HB conceived the design of the study and drafted the manuscript. UH, HB, EK, YH, TZB and MG designed the study, wrote the manuscript, and contributed to the interpretation of the data. TZB performed the statistical analysis. All authors revised the work critically and approved the final version of the manuscript. UH is guarantor of the paper and takes responsibility for the integrity of the work.

**Competing Interests:**

None declared

**Funding:**

None declared

**Data Sharing Statement:**

Raw laboratory data is available upon request by emailing the authors

## References

- 1 JUDGE JM. FEVER IN THE PEDIATRIC PATIENT. *J Am Osteopath Assoc* 1965;**64**:1171–4.
- 2 Baskin MN. The Prevalence of Serious Bacterial Infections by Age in Febrile Infants During the First 3 Months of Life. *Pediatr Ann* 1993;**22**:462–6. doi:10.3928/0090-4481-19930801-06
- 3 Gomez B, Mintegi S, Bressan S, *et al.* Validation of the “Step-by-Step” Approach in the Management of Young Febrile Infants. *Pediatrics* 2016;**138**:390–6. doi:10.1542/peds.2015-4381
- 4 Dagan R, Powell KR, Hall CB, *et al.* Identification of infants unlikely to have serious bacterial infection although hospitalized for suspected sepsis. *J Pediatr* 1985;**107**:855–60. doi:10.1016/S0022-3476(85)80175-X
- 5 Biondi EA, Byington CL. Evaluation and Management of Febrile, Well-appearing Young Infants. *Infect Dis Clin North Am* 2015;**29**:575–85. doi:10.1016/j.idc.2015.05.008
- 6 Bilavsky E, Yarden-Bilavsky H, Ashkenazi S, *et al.* C-reactive protein as a marker of serious bacterial infections in hospitalized febrile infants. *Acta Paediatr* 2009;**98**:1776–80. doi:10.1111/j.1651-2227.2009.01469.x
- 7 Olaciregui I, Hernandez U, Munoz JA, *et al.* Markers that predict serious bacterial infection in infants under 3 months of age presenting with fever of unknown origin. *Arch Dis Child* 2009;**94**:501–5. doi:10.1136/adc.2008.146530
- 8 Imtiaz F, Shafique K, Mirza SS, *et al.* Neutrophil lymphocyte ratio as a measure of systemic inflammation in prevalent chronic diseases in Asian population. *Int Arch Med* 2012;**5**:2. doi:10.1186/1755-7682-5-2
- 9 Lowsby R, Gomes C, Jarman I, *et al.* Neutrophil to lymphocyte count ratio as an early indicator of blood stream infection in the emergency department. *Emerg Med J* 2015;**32**:531–4. doi:10.1136/emered-2014-204071
- 10 de Jager CPC, van Wijk PTL, Mathoera RB, *et al.* Lymphocytopenia and neutrophil-lymphocyte count ratio predict bacteremia better than conventional infection markers in an emergency care unit. *Crit Care* 2010;**14**:R192. doi:10.1186/cc9309
- 11 Liu J, Li C, Du J, *et al.* The neutrophil-to-lymphocyte ratio correlates with age in patients with papillary thyroid carcinoma. *ORL* 2015;**77**:109–16. doi:10.1159/000375534
- 12 Bekdas M, Goksugur SB, Sarac EG, *et al.* Neutrophil/lymphocyte and C-reactive protein/mean platelet volume ratios in differentiating between viral and bacterial pneumonias and diagnosing early complications in children. *Saudi Med J* 2014;**35**:442–7.
- 13 Yazici M, Özkisacik S, Onur Öztan M, *et al.* Neutrophil/lymphocyte ratio in the diagnosis of childhood appendicitis. *Turk J Pediatr* 2010;**52**:400–3.
- 14 Uluca Ü, Ece A, Şen V, *et al.* Usefulness of mean platelet volume and neutrophil-to-lymphocyte ratio for evaluation of children with Familial Mediterranean fever. *Med Sci Monit* 2014;**20**:1578–82. doi:10.12659/MSM.892139
- 15 Dallman P.R. *Rudolph, A.M. (Ed.), Pediatrics*. sixteenth. New York: : Appleton-Century-Crofts 1977.
- 16 Kass G V. An Exploratory Technique for Investigating Large Quantities of Categorical

- 1  
2  
3 Data. *Appl Stat* 1980;**29**:119. doi:10.2307/2986296
- 4  
5 17 Leo Breiman, Jerome Friedman, Charles J. Stone RAO. *Classification and regression*  
6 *trees*. Chapman & Hall 1984.
- 7  
8 18 Greenhow TL, Hung Y-Y, Herz AM, *et al*. The Changing Epidemiology of Serious  
9 Bacterial Infections in Young Infants. *Pediatr Infect Dis J* 2014;**33**:595–9.  
10 doi:10.1097/INF.0000000000000225
- 11  
12 19 Cortese F, Scicchitano P, Gesualdo M, *et al*. Early and Late Infections in Newborns:  
13 Where Do We Stand? A Review. *Pediatr Neonatol* Published Online First: 2015.  
14 doi:10.1016/j.pedneo.2015.09.007
- 15  
16 20 Hui C, Neto G, Tsertsvadze A, *et al*. Diagnosis and management of febrile infants (0-3  
17 months). *Evid Rep Technol Assess (Full Rep)* 2012;;1–  
18 297.<http://www.ncbi.nlm.nih.gov/pubmed/24422856> (accessed 18 Jun2017).
- 19  
20 21 Stuart H. Orkin MD, David E. Fisher MD, PhD, David Ginsburg MD, A. Thomas Look  
21 MD SELM and DGNM. *Nathan and Oski's Hematology and Oncology of Infancy and*  
22 *Childhood*. 8th ed. Saunders, an imprint of Elsevier Inc. 2015.
- 23  
24 22 Wesche DE, Lomas-Neira JL, Perl M, *et al*. Leukocyte apoptosis and its significance  
25 in sepsis and shock. *J Leukoc Biol* 2005;**78**:325–37. doi:10.1189/jlb.0105017
- 26  
27 23 Lai M-Y, Tsai M-H, Lee C-W, *et al*. Characteristics of neonates with culture-proven  
28 bloodstream infection who have low levels of C-reactive protein ( $\leq 10$  mg/L). *BMC*  
29 *Infect Dis* 2015;**15**:320. doi:10.1186/s12879-015-1069-7
- 30  
31 24 Hofer N, Zacharias E, Müller W, *et al*. An Update on the Use of C-Reactive Protein in  
32 Early-Onset Neonatal Sepsis: Current Insights and New Tasks. *Neonatology*  
33 2012;**102**:25–36. doi:10.1159/000336629
- 34  
35 25 Gomez B, Bressan S, Mintegi S, *et al*. Diagnostic value of procalcitonin in well-  
36 appearing young febrile infants. *Pediatrics* 2012;**130**:815–22. doi:10.1542/peds.2011-  
37 3575
- 38  
39 26 Li J, Chen Q, Luo X, *et al*. Neutrophil-to-Lymphocyte Ratio Positively Correlates to  
40 Age in Healthy Population. *J Clin Lab Anal* 2015;**29**:437–43. doi:10.1002/jcla.21791
- 41  
42 27 Gürol G, Çiftci İH, Terizi HA, *et al*. Are there standardized cutoff values for neutrophil-  
43 lymphocyte ratios in bacteremia or sepsis? *J Microbiol Biotechnol* 2015;**25**:521–  
44 5.<http://www.ncbi.nlm.nih.gov/pubmed/25341467> (accessed 13 Feb2016).
- 45  
46 28 Hosmer DW, Lemeshow S. *Applied Logistic Regression*. Hoboken, NJ, USA: : John  
47 Wiley & Sons, Inc. 2000. doi:10.1002/0471722146
- 48  
49 29 Wingerter S, Bachur R. Risk Factors for Contamination of Catheterized Urine  
50 Specimens in Febrile Children. *Pediatr Emerg Care* 2011;**27**:1–4.  
51 doi:10.1097/PEC.0b013e3182037c20
- 52  
53 30 Tosif S, Baker A, Oakley E, *et al*. Contamination rates of different urine collection  
54 methods for the diagnosis of urinary tract infections in young children: An  
55 observational cohort study. *J Paediatr Child Health* 2012;**48**:659–64.  
56 doi:10.1111/j.1440-1754.2012.02449.x  
57  
58  
59  
60



1  
2  
3  
4  
5  
6  
7  
8  
9  
10  
11  
12  
13  
14  
15  
16  
17  
18  
19  
20  
21  
22  
23  
24  
25  
26  
27  
28  
29  
30  
31  
32  
33  
34  
35  
36  
37  
38  
39  
40  
41  
42  
43  
44  
45  
46  
47  
48  
49  
50  
51  
52  
53  
54  
55  
56  
57  
58  
59  
60

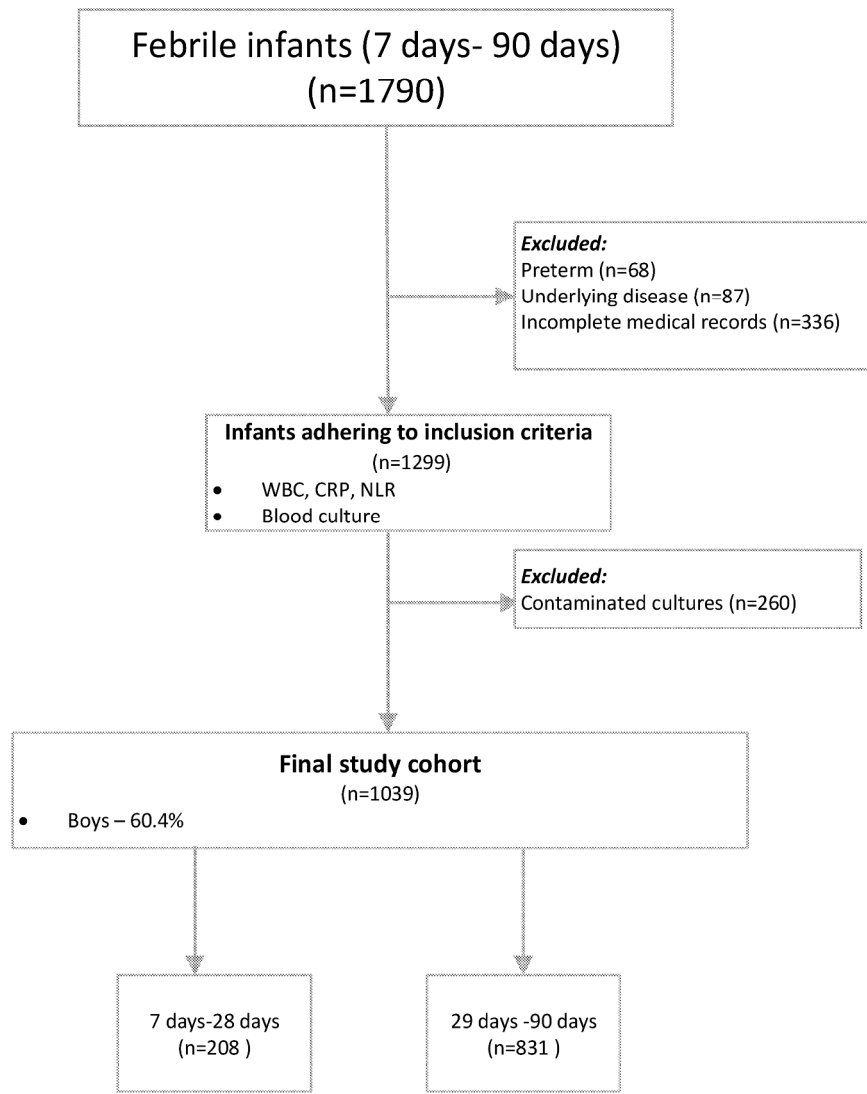

155x197mm (600 x 600 DPI)

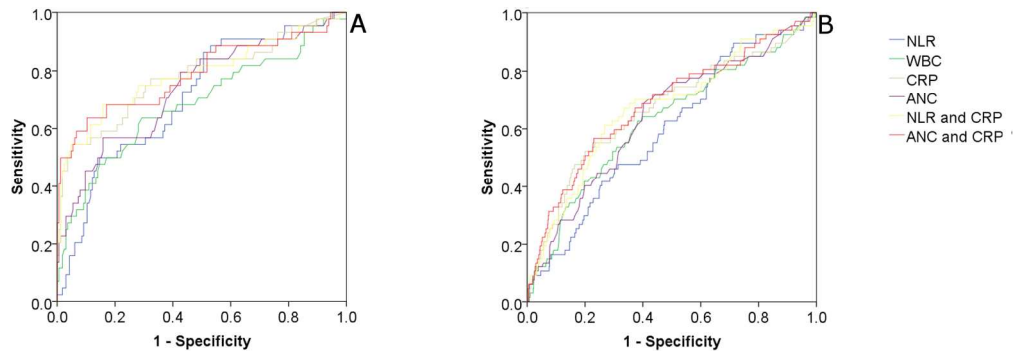

160x54mm (300 x 300 DPI)

Peer review only

1  
2  
3  
4  
5  
6  
7  
8  
9  
10  
11  
12  
13  
14  
15  
16  
17  
18  
19  
20  
21  
22  
23  
24  
25  
26  
27  
28  
29  
30  
31  
32  
33  
34  
35  
36  
37  
38  
39  
40  
41  
42  
43  
44  
45  
46  
47  
48  
49  
50  
51  
52  
53  
54  
55  
56  
57  
58  
59  
60

1  
2  
3  
4  
5  
6  
7  
8  
9  
10  
11  
12  
13  
14  
15  
16  
17  
18  
19  
20  
21  
22  
23  
24  
25  
26  
27  
28  
29  
30  
31  
32  
33  
34  
35  
36  
37  
38  
39  
40  
41  
42  
43  
44  
45  
46  
47  
48  
49  
50  
51  
52  
53  
54  
55  
56  
57  
58  
59  
60



106x45mm (300 x 300 DPI)

For peer review only

1  
2  
3  
4  
5  
6  
7  
8  
9  
10  
11  
12  
13  
14  
15  
16  
17  
18  
19  
20  
21  
22  
23  
24  
25  
26  
27  
28  
29  
30  
31  
32  
33  
34  
35  
36  
37  
38  
39  
40  
41  
42  
43  
44  
45  
46  
47  
48  
49  
50  
51  
52  
53  
54  
55  
56  
57  
58  
59  
60



108x60mm (300 x 300 DPI)

review only

| Section & Topic          | No  | Item                                                                                                                                                   | Reported on page #     |
|--------------------------|-----|--------------------------------------------------------------------------------------------------------------------------------------------------------|------------------------|
| <b>TITLE OR ABSTRACT</b> |     |                                                                                                                                                        |                        |
|                          | 1   | Identification as a study of diagnostic accuracy using at least one measure of accuracy (such as sensitivity, specificity, predictive values, or AUC)  | 2                      |
| <b>ABSTRACT</b>          |     |                                                                                                                                                        |                        |
|                          | 2   | Structured summary of study design, methods, results, and conclusions (for specific guidance, see STARD for Abstracts)                                 | 2                      |
| <b>INTRODUCTION</b>      |     |                                                                                                                                                        |                        |
|                          | 3   | Scientific and clinical background, including the intended use and clinical role of the index test                                                     | 3                      |
|                          | 4   | Study objectives and hypotheses                                                                                                                        | 3                      |
| <b>METHODS</b>           |     |                                                                                                                                                        |                        |
| <i>Study design</i>      | 5   | Whether data collection was planned before the index test and reference standard were performed (prospective study) or after (retrospective study)     | 4                      |
| <i>Participants</i>      | 6   | Eligibility criteria                                                                                                                                   | 4                      |
|                          | 7   | On what basis potentially eligible participants were identified (such as symptoms, results from previous tests, inclusion in registry)                 | 4                      |
|                          | 8   | Where and when potentially eligible participants were identified (setting, location and dates)                                                         | 4                      |
|                          | 9   | Whether participants formed a consecutive, random or convenience series                                                                                | n/a                    |
| <i>Test methods</i>      | 10a | Index test, in sufficient detail to allow replication                                                                                                  | n/a                    |
|                          | 10b | Reference standard, in sufficient detail to allow replication                                                                                          | 4                      |
|                          | 11  | Rationale for choosing the reference standard (if alternatives exist)                                                                                  | 3                      |
|                          | 12a | Definition of and rationale for test positivity cut-offs or result categories of the index test, distinguishing pre-specified from exploratory         | 10-11                  |
|                          | 12b | Definition of and rationale for test positivity cut-offs or result categories of the reference standard, distinguishing pre-specified from exploratory | 10-11                  |
|                          | 13a | Whether clinical information and reference standard results were available to the performers/readers of the index test                                 | n/a                    |
|                          | 13b | Whether clinical information and index test results were available to the assessors of the reference standard                                          | n/a                    |
| <i>Analysis</i>          | 14  | Methods for estimating or comparing measures of diagnostic accuracy                                                                                    | 5-6                    |
|                          | 15  | How indeterminate index test or reference standard results were handled                                                                                | n/a                    |
|                          | 16  | How missing data on the index test and reference standard were handled                                                                                 | 6                      |
|                          | 17  | Any analyses of variability in diagnostic accuracy, distinguishing pre-specified from exploratory                                                      | n/a                    |
|                          | 18  | Intended sample size and how it was determined                                                                                                         | n/a                    |
| <b>RESULTS</b>           |     |                                                                                                                                                        |                        |
| <i>Participants</i>      | 19  | Flow of participants, using a diagram                                                                                                                  | Fig1                   |
|                          | 20  | Baseline demographic and clinical characteristics of participants                                                                                      | 6                      |
|                          | 21a | Distribution of severity of disease in those with the target condition                                                                                 | n/a                    |
|                          | 21b | Distribution of alternative diagnoses in those without the target condition                                                                            | n/a                    |
|                          | 22  | Time interval and any clinical interventions between index test and reference standard                                                                 | n/a                    |
| <i>Test results</i>      | 23  | Cross tabulation of the index test results (or their distribution) by the results of the reference standard                                            | n/a                    |
|                          | 24  | Estimates of diagnostic accuracy and their precision (such as 95% confidence intervals)                                                                | 15-16                  |
|                          | 25  | Any adverse events from performing the index test or the reference standard                                                                            | n/a                    |
| <b>DISCUSSION</b>        |     |                                                                                                                                                        |                        |
|                          | 26  | Study limitations, including sources of potential bias, statistical uncertainty, and generalisability                                                  | 11                     |
|                          | 27  | Implications for practice, including the intended use and clinical role of the index test                                                              | 12                     |
| <b>OTHER INFORMATION</b> |     |                                                                                                                                                        |                        |
|                          | 28  | Registration number and name of registry                                                                                                               | n/a                    |
|                          | 29  | Where the full study protocol can be accessed                                                                                                          | Personal communication |
|                          | 30  | Sources of funding and other support; role of funders                                                                                                  | n/a                    |
